# Supplementary material for: Stereochemistry of Chiral 2-Substituted Chromanes: Twist of the Dihydropyran Ring and Specific Optical Rotation
Source: MDPI journal article supplement (doi:10.3390/molecules28010439), 2023-01-03
Supplement: s1 [file s1]

**Stereochemistry of chiral 2-substituted chromanes: twist of the dihydropyran ring and specific optical rotation**

Bei-Bei Yang<sup>#</sup>, Fan Gao<sup>#</sup>, Ya-Dong Yang, Ru Wang, Xin Li, Li Li<sup>\*</sup>

Beijing Key Laboratory of Active Substances Discovery and Druggability Evaluation, Institute of Materia Medica, Chinese Academy of Medical Sciences & Peking Union Medical College, Beijing 100050, China

**Table of contents**

|                                                                             |     |
|-----------------------------------------------------------------------------|-----|
| 1. Experimental $[\alpha]_D$ values for 2-aliphatic chromanes               | S2  |
| 2. Experimental $[\alpha]_D$ values for 2-aryl chromanes                    | S16 |
| 3. Experimental $[\alpha]_D$ values for 2-carboxyl chromanes                | S44 |
| 4. Conformational analysis of compound <b>35</b> at different levels in DMF | S47 |
| 5. Experimental ECD spectra of <b>35</b>                                    | S48 |

---

<sup>#</sup> B.-B. Yang and F. Gao contributed equally to this work.

<sup>\*</sup> Corresponding author. Tel.: +86-10-63165247, e-mail: annaleelin@imm.ac.cn (L. Li).

**Table S1.** Experimental  $[\alpha]_D$  values for 2-aliphatic chromanes

| Entry | Structure                                                                           | $[\alpha]_D$                                                                                      | Ref.                                                                                                                                                        |
|-------|-------------------------------------------------------------------------------------|---------------------------------------------------------------------------------------------------|-------------------------------------------------------------------------------------------------------------------------------------------------------------|
| 1     | 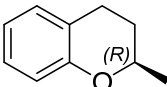   | 1) +84.1 (0.98, CHCl <sub>3</sub> ), 25°C, ee = 95.7%<br>2) +89.0 (1.0, CHCl <sub>3</sub> ), 22°C | 1) Kato Y, Yen D H, Fukudome Y, <i>et al.</i> Org. Lett. <b>2010</b> , 12(18): 4137-4139.<br>2) Hodgetts K.J. Tetrahedron, <b>2005</b> , 61(28): 6860-6870. |
| 2     |    | +84.2 (0.47, CHCl <sub>3</sub> ), 26°C, ee = 99.8%                                                | Ma Y, Li J, Ye J, <i>et al.</i> Chem. Commun. <b>2018</b> , 54(96): 13571-13574.                                                                            |
| 3     |    | -44.1 (0.32, CH <sub>2</sub> Cl <sub>2</sub> ), 25°C                                              | Birkett M.A, Knight D.W, Little P.B, <i>et al.</i> Tetrahedron, <b>2000</b> , 56(7): 1013-1023.                                                             |
| 4     |    | +56.5 (1.7, CH <sub>3</sub> OH)                                                                   | Loiodice F, Longo A, Bianco P, <i>et al.</i> Tetrahedron: Asymmetry, <b>1995</b> , 6(4): 1001-1011.                                                         |
| 5     |    | -95.0 (1, CH <sub>3</sub> OH)                                                                     | Gontcharov A. V., Nikitenko A. A., Raveendranath, P, <i>et al.</i> WO2007/123941[P]. 2007-11-1                                                              |
| 6     |   | -92.0 (1, CH <sub>3</sub> OH)                                                                     | Gontcharov A. V., Nikitenko A. A., Raveendranath, P, <i>et al.</i> WO2007/123941[P]. 2007-11-1                                                              |
| 7     |  | -120.0 (1, CH <sub>3</sub> OH)                                                                    | Gontcharov A. V., Nikitenko A. A., Raveendranath, P, <i>et al.</i> WO2007/123941[P]. 2007-11-1                                                              |
| 8     |  | -57.6 (1, CHCl <sub>3</sub> ), 23°C, ee = 90%                                                     | Lu Y, Nakatsuji H, Okumura Y, <i>et al.</i> J. Am. Chem. Soc. <b>2018</b> , 140(19): 6039-6043.                                                             |

|    |                                                                                     |                                                                                                                                                                                               |                                                                                                                                                                                                                                                                                                                                                                                |
|----|-------------------------------------------------------------------------------------|-----------------------------------------------------------------------------------------------------------------------------------------------------------------------------------------------|--------------------------------------------------------------------------------------------------------------------------------------------------------------------------------------------------------------------------------------------------------------------------------------------------------------------------------------------------------------------------------|
| 9  | 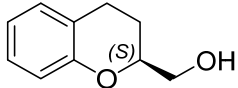   | 1) +101.2 (0.225, CH <sub>3</sub> OH), 20°C<br>2) +87.6 (1.01, CH <sub>3</sub> OH), 25°C, ee = 70%<br>3) +90.4 (0.56, CH <sub>3</sub> OH), 20°C<br>4) +110.6 (1.55, CH <sub>3</sub> OH), 25°C | 1) Ida A, Kitao K, Hoshiya N, <i>et al.</i> Tetrahedron Lett. <b>2015</b> , 56(15): 1956-1959.<br>2) Aponick A, Biannic B. Org. Lett. <b>2011</b> , 13(6): 1330-1333.<br>3) Hernández-Torres G, Carreño M.C, Urbano A, <i>et al.</i> Eur. J. Org. Chem. <b>2011</b> , 2011(20-21): 3864-3877.<br>4) Dinda S.K, Das S.K, Panda G. Synthesis, <b>2009</b> , 2009(11): 1886-1896. |
| 10 |    | 1) -78.5 (1, CH <sub>3</sub> OH), 24°C, ee = 90%<br>2) -113.4 (1.12, CH <sub>3</sub> OH)                                                                                                      | 1) Lu Y, Nakatsuji H, Okumura Y, <i>et al.</i> J. Am. Chem. Soc. <b>2018</b> , 140(19): 6039-6043.<br>2) Urban F.J, Moore B S. J. Heterocycl. Chem. <b>1992</b> , 29(2): 431-438.                                                                                                                                                                                              |
| 11 |    | +104.8 (1.5, CHCl <sub>3</sub> ), 25°C, ee = 99%                                                                                                                                              | Dinda S.K, Das S.K, Panda G. Synthesis, <b>2009</b> , 2009(11): 1886-1896.                                                                                                                                                                                                                                                                                                     |
| 12 |    | +51.0 (2.5, CH <sub>3</sub> OH), 20°C                                                                                                                                                         | Loiodice F, Longo A, Bianco P, <i>et al.</i> Tetrahedron: Asymmetry, <b>1995</b> , 6(4): 1001-1012.                                                                                                                                                                                                                                                                            |
| 13 |    | -114.3 (1.01, DMSO), 25°C                                                                                                                                                                     | Mewshaw R.E, Kavanagh J, Stack G, <i>et al.</i> J. Med. Chem. <b>1997</b> , 40(26): 4235-4256.                                                                                                                                                                                                                                                                                 |
| 14 |   | +70.81 (1.0, CHCl <sub>3</sub> ), 25°C                                                                                                                                                        | Mewshaw R.E, Marquis K L, Shi X, <i>et al.</i> Tetrahedron, <b>1998</b> , 54(25): 7081-7108.                                                                                                                                                                                                                                                                                   |
| 15 |  | -70.8 (1.0, CHCl <sub>3</sub> ), 25°C                                                                                                                                                         | Mewshaw R.E, Marquis K L, Shi X, <i>et al.</i> Tetrahedron, <b>1998</b> , 54(25): 7081-7108.                                                                                                                                                                                                                                                                                   |
| 16 |  | +110.5 (1.0, THF), 20°C                                                                                                                                                                       | Marco I, Valhondo M, Martín-Fontecha M, <i>et al.</i> J. Med. Chem. <b>2011</b> , 54(23): 7986-7999.                                                                                                                                                                                                                                                                           |

|    |                                                                                     |                                                      |                                                                                                      |
|----|-------------------------------------------------------------------------------------|------------------------------------------------------|------------------------------------------------------------------------------------------------------|
| 17 | 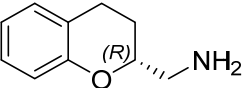   | -119.5 (1.0, THF), 20°C                              | Marco I, Valhondo M, Martín-Fontecha M, <i>et al.</i> J. Med. Chem. <b>2011</b> , 54(23): 7986-7999. |
| 18 |    | -98.0 (1.4, CHCl <sub>3</sub> ), 25°C                | Mewshaw R.E, Kavanagh J, Stack G, <i>et al.</i> J. Med. Chem. <b>1997</b> , 40(26): 4235-4256.       |
| 19 |    | +65.0 (0.5, CHCl <sub>3</sub> ), 20°C                | Marco I, Valhondo M, Martín-Fontecha M, <i>et al.</i> J. Med. Chem. <b>2011</b> , 54(23): 7986-7999. |
| 20 |    | -77.0 (0.5, CHCl <sub>3</sub> ), 20°C                | Marco I, Valhondo M, Martín-Fontecha M, <i>et al.</i> J. Med. Chem. <b>2011</b> , 54(23): 7986-7999. |
| 21 |    | +99.1 (1.96, CH <sub>2</sub> Cl <sub>2</sub> ), 25°C | Cui Y, Villafane L A, Clausen D J, <i>et al.</i> Tetrahedron, <b>2013</b> , 69(36): 7618-7626.       |
| 22 |    | -79.6 (1.36, CH <sub>3</sub> OH)                     | Bonini B.F, Carboni P, Gottarelli G, <i>et al.</i> J. Org. Chem. <b>1994</b> , 59(20): 5930-5936.    |
| 23 |   | -80.7 (0.84, CH <sub>3</sub> OH)                     | Bonini B.F, Carboni P, Gottarelli G, <i>et al.</i> J. Org. Chem. <b>1994</b> , 59(20): 5930-5936.    |
| 24 |  | -98.6 (1.19, CH <sub>3</sub> OH)                     | Bonini B.F, Carboni P, Gottarelli G, <i>et al.</i> J. Org. Chem. <b>1994</b> , 59(20): 5930-5936.    |
| 25 |  | +120.0 (1, CHCl <sub>3</sub> ), 25°C                 | Mewshaw R.E, Kavanagh J, Stack G, <i>et al.</i> J. Med. Chem. <b>1997</b> , 40(26): 4235-4256.       |

|    |                                                                                     |                                                                                                                                                                                                                                                                                           |                                                                                                                                                                                                                                                                                                                                                                                                                                                                                                                                     |
|----|-------------------------------------------------------------------------------------|-------------------------------------------------------------------------------------------------------------------------------------------------------------------------------------------------------------------------------------------------------------------------------------------|-------------------------------------------------------------------------------------------------------------------------------------------------------------------------------------------------------------------------------------------------------------------------------------------------------------------------------------------------------------------------------------------------------------------------------------------------------------------------------------------------------------------------------------|
| 26 | 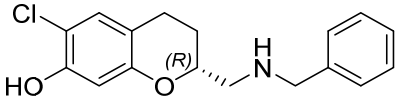   | -124.0 (1, CHCl <sub>3</sub> ), 25°C                                                                                                                                                                                                                                                      | Mewshaw R.E, Kavanagh J, Stack G, <i>et al.</i> J. Med. Chem. <b>1997</b> , 40(26): 4235-4256.                                                                                                                                                                                                                                                                                                                                                                                                                                      |
| 27 |    | -72.0 (1, CH <sub>3</sub> OH)                                                                                                                                                                                                                                                             | Gontcharov A. V., Nikitenko A. A., Raveendranath, P, <i>et al.</i> WO2007/123941[P]. 2007-11-1                                                                                                                                                                                                                                                                                                                                                                                                                                      |
| 28 |    | -62.1 (1, CHCl <sub>3</sub> ), 20°C, ee = 95%                                                                                                                                                                                                                                             | Valla C, Baeza A, Menges F, <i>et al.</i> Synlett, <b>2008</b> , 2008(20): 3167-3171.                                                                                                                                                                                                                                                                                                                                                                                                                                               |
| 29 |    | +7.5 (0.4, CHCl <sub>3</sub> ), 25°C                                                                                                                                                                                                                                                      | Dinda S.K, Das S.K, Panda G. Synthesis, <b>2009</b> , 2009(11): 1886-1896.                                                                                                                                                                                                                                                                                                                                                                                                                                                          |
| 30 |    | +13.91 (1.75, CH <sub>3</sub> OH), 25°C                                                                                                                                                                                                                                                   | Dinda S.K, Das S.K, Panda G. Synthesis, <b>2009</b> , 2009(11): 1886-1896.                                                                                                                                                                                                                                                                                                                                                                                                                                                          |
| 31 |    | 1) -73.8 (1, CHCl <sub>3</sub> ), 25°C, ee = 98%<br>2) -76.5 (0.27, CHCl <sub>3</sub> ), 25°C, ee = 94%<br>3) +80.3 (0.27, CH <sub>2</sub> Cl <sub>2</sub> ), ee = 84%<br>4) -10.3 (1.0, CH <sub>2</sub> Cl <sub>2</sub> )<br>5) -80.3 (0.27, CH <sub>2</sub> Cl <sub>2</sub> ), ee = 84% | 1) Schaefroth M A, Rummelt S.M, Sarlah D, <i>et al.</i> Org. Lett. <b>2017</b> , 19(12): 3235-3238.<br>2) Cannon J.S, Olson A.C, Overman L.E, <i>et al.</i> J. Org. Chem. <b>2012</b> , 77(4): 1961-1973.<br>3) Trost B.M, Shen H.C, Dong L, <i>et al.</i> J. Am. Chem. Soc. <b>2004</b> , 126(38): 11966-11983.<br>4) Labrosse J.R, Poncet C, Lhoste P, <i>et al.</i> Tetrahedron: Asymmetry, <b>1999</b> , 10(6): 1069-1078.<br>5) Trost B.M, Shen H.C, Dong L, <i>et al.</i> J. Am. Chem. Soc. <b>2003</b> , 125(31): 9276-9277. |
| 32 |  | 1) -92.9 (0.85, CHCl <sub>3</sub> ), 20°C<br>2) +62.4 (0.35, Et <sub>2</sub> O), ee = 80%<br>3) -62.4 (0.35, Et <sub>2</sub> O), ee = 80%                                                                                                                                                 | 1) Carreño M.C, Hernández-Torres G, Urbano A, <i>et al.</i> Eur. J. Org. Chem. <b>2008</b> , 2008(12): 2035-2038.<br>2) Trost B.M, Shen H.C, Dong L, <i>et al.</i> J. Am. Chem. Soc. <b>2004</b> , 126(38): 11966-11983.<br>3) Trost B.M, Shen H.C, Dong L, <i>et al.</i> J. Am. Chem. Soc.                                                                                                                                                                                                                                         |

|    |                                                                                     |                                                         |                                                                                                                                     |
|----|-------------------------------------------------------------------------------------|---------------------------------------------------------|-------------------------------------------------------------------------------------------------------------------------------------|
| 33 | 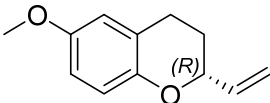   | -83.7 (0.54, CHCl <sub>3</sub> ), 25°C, ee = 91%        | <b>2003</b> , 125(31): 9276-9277.<br>Cannon J.S, Olson A.C, Overman L.E, <i>et al.</i> J. Org. Chem <b>2012</b> , 77(4): 1961-1973. |
| 34 |    | -63.4 (0.4, CHCl <sub>3</sub> ), 25°C, ee = 90%         | Cannon J.S, Olson A.C, Overman L.E, <i>et al.</i> J. Org. Chem. <b>2012</b> , 77(4): 1961-1973.                                     |
| 35 |    | +9.1 (1.2, CHCl <sub>3</sub> ), 23°C                    | Ida A, Kitao K, Hoshiya N, <i>et al.</i> Tetrahedron Lett. <b>2015</b> , 56(15): 1956-1959.                                         |
| 36 |    | +69.4 (1, CH <sub>2</sub> Cl <sub>2</sub> ), ee = 70%   | Aponick A, Biannic B. Org. Lett. <b>2011</b> , 13(6): 1330-1333.                                                                    |
| 37 |    | -67.4 (1.0, CH <sub>2</sub> Cl <sub>2</sub> ), ee = 75% | Aponick A, Biannic B. Org. Lett. <b>2011</b> , 13(6): 1330-1333.                                                                    |
| 38 |   | -17.8 (1.46, CH <sub>3</sub> OH), 25°C                  | Dinda S.K, Das S.K, Panda G. Synthesis, <b>2009</b> , 2009(11): 1886-1896.                                                          |
| 39 |  | -1.0 (3.0, CHCl <sub>3</sub> ), 20°C                    | Chung Y.K, Fu G.C. Angew. Chem. Int. Ed. <b>2009</b> , 48(12): 2225-2227.                                                           |
| 40 |  | +5.4 (1.21, CH <sub>3</sub> OH), 25°C                   | Dinda S.K, Das S.K, Panda G. Synthesis, <b>2009</b> , 2009(11): 1886-1896.                                                          |

|    |                                                                                     |                                                                                                                                             |                                                                                                                                                                                                                                                                                                |
|----|-------------------------------------------------------------------------------------|---------------------------------------------------------------------------------------------------------------------------------------------|------------------------------------------------------------------------------------------------------------------------------------------------------------------------------------------------------------------------------------------------------------------------------------------------|
| 41 | 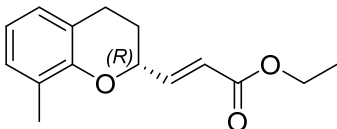   | +25.0 (2, CHCl <sub>3</sub> ), 20°C, ee = 84%                                                                                               | Chung Y.K, Fu G.C. <i>Angew. Chem. Int. Ed.</i> <b>2009</b> , 48(12): 2225-2227.                                                                                                                                                                                                               |
| 42 |    | +34.0 (1, CHCl <sub>3</sub> ), 20°C, ee = 63%                                                                                               | Chung Y.K, Fu G.C. <i>Angew. Chem. Int. Ed.</i> <b>2009</b> , 48(12): 2225-2227.                                                                                                                                                                                                               |
| 43 |    | 1) -90.0 (1, CH <sub>3</sub> OH), 21°C, ee = 88%<br>2) -92.6 (1, CHCl <sub>3</sub> ), 21°C, ee = 88%<br>3) -110.0 (1.0, CH <sub>3</sub> OH) | 1) Hu N, Li K, Wang Z, <i>et al.</i> <i>Angew. Chem. Int. Ed.</i> <b>2016</b> , 55(16): 5044-5048.<br>2) Hu N, Li K, Wang Z, <i>et al.</i> <i>Angew. Chem. Int. Ed.</i> <b>2016</b> , 55(16): 5044-5048.<br>3) Urban F.J, Moore B.S. <i>J. heterocycl. Chem.</i> <b>1992</b> , 29(2): 431-438. |
| 44 |    | +164.0 (1, CH <sub>3</sub> OH)                                                                                                              | Urban F.J, Moore B.S. <i>J. heterocycl. Chem.</i> <b>1992</b> , 29(2): 431-438.                                                                                                                                                                                                                |
| 45 |    | -164.4 (1.0, CH <sub>3</sub> OH)                                                                                                            | Urban F.J, Moore B.S. <i>J. heterocycl. Chem.</i> <b>1992</b> , 29(2): 431-438.                                                                                                                                                                                                                |
| 46 |    | +114.8 (1.0, CH <sub>3</sub> OH)                                                                                                            | Urban F.J, Moore B.S. <i>J. heterocycl. Chem.</i> <b>1992</b> , 29(2): 431-438.                                                                                                                                                                                                                |
| 47 |  | -112.6 (1, CH <sub>3</sub> OH)                                                                                                              | Urban F.J, Moore B.S. <i>J. heterocycl. Chem.</i> <b>1992</b> , 29(2): 431-438.                                                                                                                                                                                                                |
| 48 |  | +43.1 (0.8, CHCl <sub>3</sub> ), 24°C, ee = 96%                                                                                             | Srinivas H.D, Maity P, Yap G.P.A, <i>et al.</i> <i>J. Org. Chem.</i> <b>2015</b> , 80(8): 4003-4016.                                                                                                                                                                                           |

|    |                                                                                     |                                                                                                                                                |                                                                                                                                                                                                                                                                                     |
|----|-------------------------------------------------------------------------------------|------------------------------------------------------------------------------------------------------------------------------------------------|-------------------------------------------------------------------------------------------------------------------------------------------------------------------------------------------------------------------------------------------------------------------------------------|
| 49 | 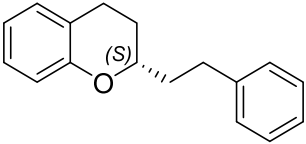   | 1) -127.7 (0.6, CHCl <sub>3</sub> ), 23°C, ee = 96%<br>2) -103.18 (1.0, CHCl <sub>3</sub> ), 22°C<br>3) -116.3 (1.0, CHCl <sub>3</sub> ), 23°C | 1) Guan Y, Attard J.W, Mattson A.E. Chem. Eur. J. <b>2020</b> , 26(8): 1742-1747.<br>2) DeRatt L.G, Pappoppula M, Aponick A. Angew. Chem. Int. Ed. <b>2019</b> , 58(25): 8416-8420.<br>3) Moquist P.N, Kodama T, Schaus S.E. Angew. Chem. Int. Ed. <b>2010</b> , 49(39): 7096-7100. |
| 50 |    | +74.0 (1.56, CHCl <sub>3</sub> ), 26°C, ee = 93%                                                                                               | Azuma T, Murata A, Kobayashi Y, <i>et al.</i> Org. Lett. <b>2014</b> , 16(16): 4256-4259.                                                                                                                                                                                           |
| 51 |    | +32.1 (0.47, CH <sub>2</sub> Cl <sub>2</sub> ), 18°C, ee = 36%                                                                                 | Miyaji R, Asano K, Matsubara S. Org. Biomol. Chem. <b>2014</b> , 12(1): 119-122.                                                                                                                                                                                                    |
| 52 |    | +58.9 (0.58, CHCl <sub>3</sub> ), 26°C, ee = 97%                                                                                               | Azuma T, Murata A, Kobayashi Y, <i>et al.</i> Org. Lett. <b>2014</b> , 16(16): 4256-4259.                                                                                                                                                                                           |
| 53 |    | -53.9 (1.04, CHCl <sub>3</sub> ), ee = 92%                                                                                                     | Wang L, Yang D, Li D, <i>et al.</i> Angew. Chem. Int. Ed. <b>2018</b> , 57(29): 9088-9092.                                                                                                                                                                                          |
| 54 |    | +76.1 (0.74, CHCl <sub>3</sub> ), 25°C, ee = 93%                                                                                               | Azuma T, Murata A, Kobayashi Y, <i>et al.</i> Org. Lett. <b>2014</b> , 16(16): 4256-4259.                                                                                                                                                                                           |
| 55 |   | -46.9 (0.96, CHCl <sub>3</sub> ), ee = 92%                                                                                                     | Wang L, Yang D, Li D, <i>et al.</i> Angew. Chem. Int. Ed. <b>2018</b> , 57(29): 9088-9092.                                                                                                                                                                                          |
| 56 |  | +89.2 (0.89, CHCl <sub>3</sub> ), 25°C, ee = 96%                                                                                               | Azuma T, Murata A, Kobayashi Y, <i>et al.</i> Org. Lett. <b>2014</b> , 16(16): 4256-4259.                                                                                                                                                                                           |

|    |                                                                                     |                                                                 |                                                                                                                |
|----|-------------------------------------------------------------------------------------|-----------------------------------------------------------------|----------------------------------------------------------------------------------------------------------------|
| 57 | 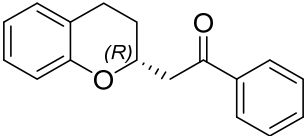   | -39.5 (3.61, CH <sub>2</sub> Cl <sub>2</sub> ), 18°C, ee = 84%  | Miyaji R, Asano K, Matsubara S. Org. Biomol. Chem. <b>2014</b> , 12(1): 119-122.                               |
| 58 |    | +77.5 (0.98, CHCl <sub>3</sub> ), 26°C, ee = 94%                | Azuma T, Murata A, Kobayashi Y, <i>et al.</i> Org. Lett. <b>2014</b> , 16(16): 4256-4259.                      |
| 59 |    | -277.8 (0.17, CH <sub>2</sub> Cl <sub>2</sub> ), 18°C, ee = 65% | Miyaji R, Asano K, Matsubara S. Org. Biomol. Chem. <b>2014</b> , 12(1): 119-122.                               |
| 60 |    | +38.494 (0.35, CHCl <sub>3</sub> ), 21.9°C, ee = 94%            | Reddy R.R, Gudup S.S, Ghorai P. Angew. Chem. Int. Ed. <b>2016</b> , 55(48): 15115-15119.                       |
| 61 |    | -292.6 (0.54, CH <sub>2</sub> Cl <sub>2</sub> ), 18°C, ee = 74% | Miyaji R, Asano K, Matsubara S. Org. Biomol. Chem. <b>2014</b> , 12(1): 119-122.                               |
| 62 |   | +96.95 (0.5, CHCl <sub>3</sub> ), 20°C                          | Fischer T, Bamberger J, Gómez-Martínez M, <i>et al.</i> Angew. Chem. Int. Ed. <b>2019</b> , 58(10): 3217-3221. |
| 63 |  | -19.6 (2.8, CH <sub>2</sub> Cl <sub>2</sub> ), 18°C, ee = 83%   | Miyaji R, Asano K, Matsubara S. Org. Biomol. Chem. <b>2014</b> , 12(1): 119-122.                               |
| 64 |  | +54.6 (0.3, CHCl <sub>3</sub> ), 25°C                           | Lee S, Kaib P.S.J, List B. J. Am. Chem. Soc. <b>2017</b> , 139(6): 2156-2159.                                  |

|    |                                                                                     |                                                                |                                                                                            |
|----|-------------------------------------------------------------------------------------|----------------------------------------------------------------|--------------------------------------------------------------------------------------------|
| 65 | 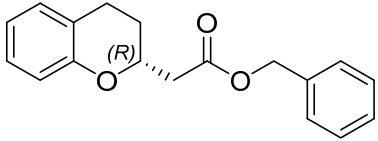   | -37.9 (1.03, CHCl <sub>3</sub> )                               | Wang L, Yang D, Li D, <i>et al.</i> Angew. Chem. Int. Ed. <b>2018</b> , 57(29): 9088-9092. |
| 66 |    | +12.08 (0.45, CHCl <sub>3</sub> ), 20.9°C, ee = 90%            | Reddy R.R, Gudup S.S, Ghorai P. Angew. Chem. Int. Ed. <b>2016</b> , 55(48): 15115-15119.   |
| 67 |    | -27.0 (3.95, CH <sub>2</sub> Cl <sub>2</sub> ), 18°C, ee = 84% | Miyaji R, Asano K, Matsubara S. Org. Biomol. Chem. <b>2014</b> , 12(1): 119-122.           |
| 68 |    | +10.466 (0.3, CHCl <sub>3</sub> ), 21.9°C, ee = 93%            | Reddy R.R, Gudup S.S, Ghorai P. Angew. Chem. Int. Ed. <b>2016</b> , 55(48): 15115-15119.   |
| 69 |    | -19.0 (5.2, CH <sub>2</sub> Cl <sub>2</sub> ), 18°C, ee = 84%  | Miyaji R, Asano K, Matsubara S. Org. Biomol. Chem. <b>2014</b> , 12(1): 119-122.           |
| 70 |  | +12.933 (0.15, CHCl <sub>3</sub> ), 22.6°C, ee = 86%           | Reddy R.R, Gudup S.S, Ghorai P. Angew. Chem. Int. Ed. <b>2016</b> , 55(48): 15115-15119.   |
| 71 |  | -58.2 (1, CHCl <sub>3</sub> ), ee = 84%                        | Wang L, Yang D, Li D, <i>et al.</i> Angew. Chem. Int. Ed. <b>2018</b> , 57(29): 9088-9092. |

|    |                                                                                     |                                                   |                                                                                                       |
|----|-------------------------------------------------------------------------------------|---------------------------------------------------|-------------------------------------------------------------------------------------------------------|
| 72 | 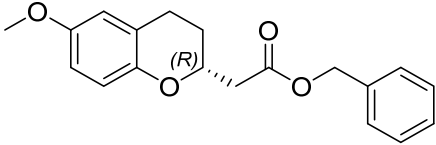   | -56.0 (0.98, CHCl <sub>3</sub> ), ee = 93%        | Wang L, Yang D, Li D, <i>et al.</i> Angew. Chem. Int. Ed. <b>2018</b> , 57(29): 9088-9092.            |
| 73 |    | -48.7 (1.01, CHCl <sub>3</sub> ), ee = 74%        | Wang L, Yang D, Li D, <i>et al.</i> Angew. Chem. Int. Ed. <b>2018</b> , 57(29): 9088-9092.            |
| 74 |    | -33.6 (1.01, CHCl <sub>3</sub> ), ee = 77%        | Wang L, Yang D, Li D, <i>et al.</i> Angew. Chem. Int. Ed. <b>2018</b> , 57(29): 9088-9092.            |
| 75 |    | +130.8 (1.47, CHCl <sub>3</sub> ), 25°C, ee = 93% | Glazier D.A, Schroeder J.M, Liu J, <i>et al.</i> Adv. Synth. Catal. <b>2018</b> , 360(23): 4646-4649. |
| 76 |   | -23.1 (1.0, CHCl <sub>3</sub> ), ee = 86%         | Wang L, Yang D, Li D, <i>et al.</i> Angew. Chem. Int. Ed. <b>2018</b> , 57(29): 9088-9092.            |
| 77 |  | +92.1 (0.635, CHCl <sub>3</sub> ), 25°C, ee = 96% | Glazier D.A, Schroeder J.M, Liu J, <i>et al.</i> Adv. Synth. Catal. <b>2018</b> , 360(23): 4646-4649. |

|    |                                                                                     |                                                                          |                                                                                                                                                                               |
|----|-------------------------------------------------------------------------------------|--------------------------------------------------------------------------|-------------------------------------------------------------------------------------------------------------------------------------------------------------------------------|
| 78 | 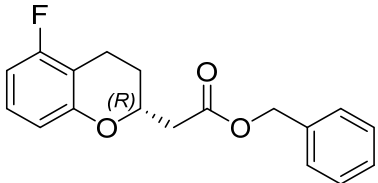   | -33.0 (1, CHCl <sub>3</sub> ), ee = 59%                                  | Wang L, Yang D, Li D, <i>et al.</i> Angew. Chem. Int. Ed. <b>2018</b> , 57(29): 9088-9092.                                                                                    |
| 79 |    | +59.6 (1.81, CHCl <sub>3</sub> ), ee = 94%                               | Azuma T, Murata A, Kobayashi Y, <i>et al.</i> Org. Lett. 2014, 16(16): 4256-4259.                                                                                             |
| 80 |    | +46.3 (0.47, CHCl <sub>3</sub> ), ee = 91%                               | Azuma T, Murata A, Kobayashi Y, <i>et al.</i> Org. Lett. <b>2014</b> , 16(16): 4256-4259.                                                                                     |
| 81 |    | +40.3 (0.2, CHCl <sub>3</sub> ), 28.7°C, ee = 93%                        | Reddy R.R, Gudup S.S, Ghorai P. Angew. Chem. Int. Ed. <b>2016</b> , 55(48): 15115-15119.                                                                                      |
| 82 |    | 1) -61.9 (1.5, CH <sub>3</sub> OH)<br>2) -65.1 (1.0, CH <sub>3</sub> OH) | 1) Bonini B.F, Carboni P, Gottarelli G, <i>et al.</i> J. Org. Chem. <b>1994</b> , 59(20): 5930-5936.<br>2) Urban, Moore, J. Heterocycl. Chem. <b>1992</b> , 29(2): 431 – 438. |
| 83 |   | +19.0 (4.3, CHCl <sub>3</sub> ), 25°C, ee = 97%                          | Glazier D.A, Schroeder J.M, Liu J, <i>et al.</i> Adv. Synth. Catal. <b>2018</b> , 360(23): 4646-4649.                                                                         |
| 84 |  | -128.8 (0.4, CH <sub>2</sub> Cl <sub>2</sub> ), 18°C, ee = 75%           | Miyaji R, Asano K, Matsubara S. Org. Biomol. Chem. <b>2014</b> , 12(1): 119-122.                                                                                              |

|    |                                                                                     |                                                  |                                                                                                       |
|----|-------------------------------------------------------------------------------------|--------------------------------------------------|-------------------------------------------------------------------------------------------------------|
| 85 | 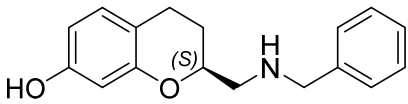   | +104.0 (1.15, CHCl <sub>3</sub> ), 25°C          | Mewshaw R.E, Kavanagh J, Stack G, <i>et al.</i> J. Med. Chem. <b>1997</b> , 40(26): 4235-4256.        |
| 86 |    | -110.0 (1.04, CHCl <sub>3</sub> ), 25°C          | Mewshaw R.E, Kavanagh J, Stack G, <i>et al.</i> J. Med. Chem. <b>1997</b> , 40(26): 4235-4256.        |
| 87 |    | +74.82 (0.052, CH <sub>3</sub> OH), 20°C         | De Bruyn M.F.L, Van Emelen K, Wigerinck P.T.B P, <i>et al.</i> U.S. Patent 6,900,222[P]. 2005-5-31.   |
| 88 |    | -111.0 (1, CH <sub>3</sub> OH)                   | Gontcharov A. V., Nikitenko A. A., Raveendranath, P, <i>et al.</i> WO2007/123941[P]. 2007-11-1        |
| 89 |    | +87.6 (0.94, CHCl <sub>3</sub> ), 25°C, ee = 95% | Glazier D.A, Schroeder J.M, Liu J, <i>et al.</i> Adv. Synth. Catal. <b>2018</b> , 360(23): 4646-4649. |
| 90 |   | -54.2 (1, CHCl <sub>3</sub> ), 25°C              | Mewshaw R.E, Kavanagh J, Stack G, <i>et al.</i> J. Med. Chem. <b>1997</b> , 40(26): 4235-4256.        |
| 91 |  | +120.0 (1, CHCl <sub>3</sub> ), 25°C             | Mewshaw R.E, Kavanagh J, Stack G, <i>et al.</i> J. Med. Chem. <b>1997</b> , 40(26): 4235-4256.        |
| 92 |  | -124.0 (1, CHCl <sub>3</sub> ), 25°C             | Mewshaw R.E, Kavanagh J, Stack G, <i>et al.</i> J. Med. Chem. <b>1997</b> , 40(26): 4235-4256.        |

|    |                                                                                    |                                                  |                                                                                                       |
|----|------------------------------------------------------------------------------------|--------------------------------------------------|-------------------------------------------------------------------------------------------------------|
| 93 | 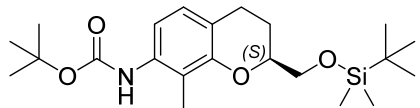  | +45.2 (1, CHCl <sub>3</sub> ), 25°C              | Mewshaw R.E, Marquis K L, Shi X, <i>et al.</i> Tetrahedron, <b>1998</b> , 54(25): 7081-7108.          |
| 94 |   | -42.2 (1, CHCl <sub>3</sub> ), 25°C              | Mewshaw R.E, Marquis K L, Shi X, <i>et al.</i> Tetrahedron, <b>1998</b> , 54(25): 7081-7108.          |
| 95 |   | +172.4 (4.6, CHCl <sub>3</sub> ), 25°C, ee = 94% | Glazier D.A, Schroeder J.M, Liu J, <i>et al.</i> Adv. Synth. Catal. <b>2018</b> , 360(23): 4646-4649. |
| 96 |   | +64.5 (0.2, CHCl <sub>3</sub> ), 20°C, ee = 94%  | Gavin D.P, Foley A, Moody T.S, <i>et al.</i> Tetrahedron: Asymmetry, <b>2017</b> , 28(4): 577-585.    |
| 97 |   | +69.7 (1.01, CHCl <sub>3</sub> ), 23°C           | Denmark S.E, Kornfilt D.J.P. J. Org. Chem. <b>2017</b> , 82(6): 3192-3222.                            |
| 98 |  | +45.0 (0.92, CHCl <sub>3</sub> ), 20°C           | Wakita F, Ando Y, Ohmori K, <i>et al.</i> Org. Lett. <b>2018</b> , 20(13): 3928-3932.                 |

|     |                                                                                     |                                                      |                                                                                                            |
|-----|-------------------------------------------------------------------------------------|------------------------------------------------------|------------------------------------------------------------------------------------------------------------|
| 99  | 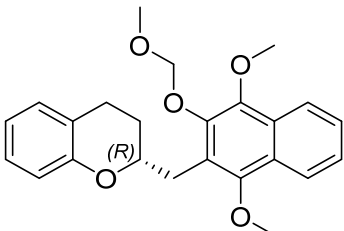   | -49.0 (1, CHCl <sub>3</sub> ), 20°C                  | Wakita F, Ando Y, Ohmori K, <i>et al.</i> Org. Lett. <b>2018</b> , 20(13): 3928-3932.                      |
| 100 |    | +21.0 (0.99, CHCl <sub>3</sub> ), 20°C               | Wakita F, Ando Y, Ohmori K, <i>et al.</i> Org. Lett. <b>2018</b> , 20(13): 3928-3932.                      |
| 101 |    | -21.0 (1.05, CHCl <sub>3</sub> ), 20°C               | Wakita F, Ando Y, Ohmori K, <i>et al.</i> Org. Lett. <b>2018</b> , 20(13): 3928-3932.                      |
| 102 |    | +150.8 (0.01065, CHCl <sub>3</sub> ), 25°C, ee = 96% | Glazier D.A, Schroeder J.M, Liu J, <i>et al.</i> Adv. Synth. Catal. <b>2018</b> , 360(23): 4646-4649.      |
| 103 |   | -153.1 (0.00995, CHCl <sub>3</sub> ), 25°C, ee = 96% | Glazier D.A, Schroeder J.M, Liu J, <i>et al.</i> Adv. Synth. Catal. <b>2018</b> , 360(23): 4646-4649.      |
| 104 |  | +39.27 (0.62, CHCl <sub>3</sub> ), 25°C, ee = 96%    | Glazier D.A, Schroeder J.M, Liu J, <i>et al.</i> Adv. Synth. Catal. <b>2018</b> , 360(23): 4646-4649.      |
| 105 |  | -11.5 (0.35, CHCl <sub>3</sub> ), 25°C               | Kobayashi Y, Taniguchi Y, Hayama N, <i>et al.</i> Angew. Chem. Int. Ed. <b>2013</b> , 52(42): 11114-11118. |

106

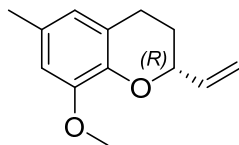

-62.3 (0.21, CHCl<sub>3</sub>), 82%

Trost B.M, Shen H.C, Dong L, *et al.* J. Am. Chem. Soc. **2004**,  
126(38): 11966-11983.

---

**Table S2.** Experimental  $[\alpha]_D$  values for 2-aryl chromanes

| Entry | Structure                                                                           | $[\alpha]_D$                                                                                                                          | Ref.                                                                                                                                                                                                                                                      |
|-------|-------------------------------------------------------------------------------------|---------------------------------------------------------------------------------------------------------------------------------------|-----------------------------------------------------------------------------------------------------------------------------------------------------------------------------------------------------------------------------------------------------------|
| 1     | 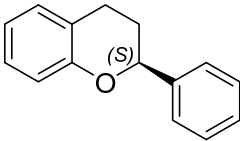   | 1) -15.0 (0.5, CHCl <sub>3</sub> ), 24°C<br>2) -12.0 (0.6, CHCl <sub>3</sub> ), 25°C, 79%<br>3) -15.0 (3.0, CHCl <sub>3</sub> ), 22°C | 1) Antus S, Baitz-Gács E, Kajtár J, <i>et al.</i> Liebigs Ann. Chem. <b>1994</b> , 1994(5): 497-502.<br>2) Sakamoto K, Nishimura T. Adv. Synth. Catal. <b>2019</b> , 361(9): 2124-2128.<br>3) Hodgetts K.J. Tetrahedron, <b>2005</b> , 61(28): 6860-6870. |
| 2     |    | 1) +14.4 (1, CHCl <sub>3</sub> ), 27°C, ee = 95%<br>2) +16.6 (1.05, CHCl <sub>3</sub> ), 23°C                                         | 1) Lu Y, Nakatsuji H, Okumura Y, <i>et al.</i> J. Am. Chem. Soc. <b>2018</b> , 140(19): 6039-6043.<br>2) Denmark S.E, Kornfilt D.J.P. J. Org. Chem. <b>2017</b> , 82(6): 3192-3222.                                                                       |
| 3     |    | -18.0 (3.0, CHCl <sub>3</sub> ), 22°C                                                                                                 | Hodgetts K.J. Tetrahedron, <b>2005</b> , 61(28): 6860-6870.                                                                                                                                                                                               |
| 4     |   | +26.0 (0.48, CHCl <sub>3</sub> ), 20°C                                                                                                | Cardillo G, Merlini L, Nasini G, <i>et al.</i> J. Chem. Soc. C: Organic, <b>1971</b> : 3967-3970.                                                                                                                                                         |
| 5     |  | +109.0 (1, CHCl <sub>3</sub> ), 22°C                                                                                                  | Hodgetts K.J. Tetrahedron, <b>2005</b> , 61(28): 6860-6870.                                                                                                                                                                                               |
| 6     |  | -287.0 (1, CHCl <sub>3</sub> ), 22°C                                                                                                  | Hodgetts K.J. Tetrahedron, <b>2005</b> , 61(28): 6860-6870.                                                                                                                                                                                               |

|    |                                                                                     |                                                                                                                             |                                                                                                                                                                                                                                                                |
|----|-------------------------------------------------------------------------------------|-----------------------------------------------------------------------------------------------------------------------------|----------------------------------------------------------------------------------------------------------------------------------------------------------------------------------------------------------------------------------------------------------------|
| 7  | 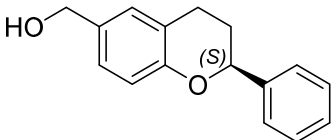   | +2.0 (1, CHCl <sub>3</sub> ), 22°C                                                                                          | Hodgetts K.J. Tetrahedron, <b>2005</b> , 61(28): 6860-6870.                                                                                                                                                                                                    |
| 8  |    | +26.7 (1, CHCl <sub>3</sub> ), 20°C, ee = 99%                                                                               | Valla C, Baeza A, Menges F, <i>et al.</i> Synlett, <b>2008</b> , 2008(20): 3167-3171.                                                                                                                                                                          |
| 9  |    | -12.0 (1, CHCl <sub>3</sub> ), 22°C                                                                                         | Hodgetts K.J. Tetrahedron, <b>2005</b> , 61(28): 6860-6870.                                                                                                                                                                                                    |
| 10 |    | +25.6 (0.36, CH <sub>2</sub> Cl <sub>2</sub> ), 25°C                                                                        | Birkett M.A, Knight D W, Little P B, <i>et al.</i> Tetrahedron, <b>2000</b> , 56(7): 1013-1023.                                                                                                                                                                |
| 11 |   | +37.0 (1, CHCl <sub>3</sub> ), 22°C                                                                                         | Hodgetts K.J. Tetrahedron, <b>2005</b> , 61(28): 6860-6870.                                                                                                                                                                                                    |
| 12 |  | 1) -5.3 (0.27, CHCl <sub>3</sub> )<br>2) -5.7 (0.42, CHCl <sub>3</sub> ), 20°C<br>3) -8.22 (1.08, CHCl <sub>3</sub> ), 24°C | 1) Guo Z, Wang Z, Tang Y. Org. Lett. <b>2018</b> , 20(7): 1819-1823.<br>2) Schmid M, Trauner D, Angew. Chem. Int. Ed. <b>2017</b> , 56(40): 12332 -12335.<br>3) Okamoto A, Ozawa T, Imagawa H, <i>et al.</i> Agric. Biol Chem. <b>1986</b> , 50(6): 1655-1656. |

13

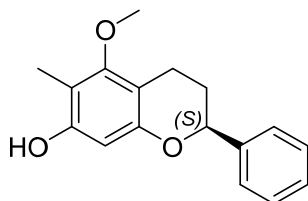

1) -9.3 (2.1, CHCl<sub>3</sub>), 20°C  
 2) -9.25, 20°C

1) Wang X, Batubara I, Yamauchi K, *et al.* Fitoterapia, **2019**, 138: 104280.  
 2) Cardillo G, Merlini L, Nasini G, *et al.* J. Chem. Soc. C: Organic, **1971**: 3967-3970.

14

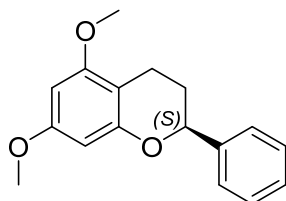

-9.0 (1, CHCl<sub>3</sub>), 22°C

Hodgetts K.J. Tetrahedron, **2005**, 61(28): 6860-6870.

15

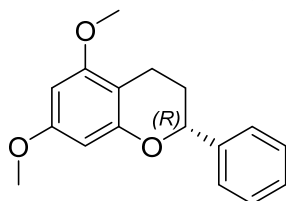

+7.5 (1, CHCl<sub>3</sub>), 25°C, ee = 96%

Li Y, Wang Z, Ding K. Chem. Eur. J. **2015**, 21(46): 16387-16390.

16

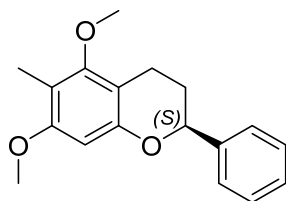

-3.5 (0.3, CHCl<sub>3</sub>), 20°C

Wang X, Batubara I, Yamauchi K, *et al.* Fitoterapia, **2019**, 138: 104280.

17

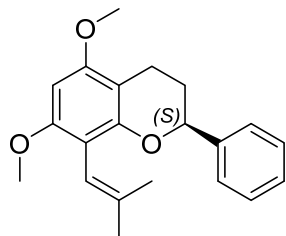

-79.5 (0.088, CHCl<sub>3</sub>), 20°C

Gomez F, Quijano L, Garcia G, *et al.* Phytochemistry, **1983**, 22(5): 1305-1306.

|    |                                                                                     |                                                                                   |                                                                                                                                                                                       |
|----|-------------------------------------------------------------------------------------|-----------------------------------------------------------------------------------|---------------------------------------------------------------------------------------------------------------------------------------------------------------------------------------|
| 18 | 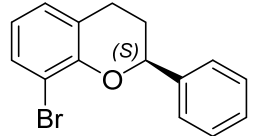   | -143.0 (1, CHCl <sub>3</sub> ), 22°C                                              | Hodgetts K.J. Tetrahedron, <b>2005</b> , 61(28): 6860-6870.                                                                                                                           |
| 19 |    | +3.0 (1, CHCl <sub>3</sub> ), 22°C                                                | Hodgetts K.J. Tetrahedron, <b>2005</b> , 61(28): 6860-6870.                                                                                                                           |
| 20 |    | -10.1 (0.375, CHCl <sub>3</sub> ), 22°C                                           | Schmid M, Trauner D. Angew. Chem. Int. Ed. <b>2017</b> , 56(40): 12332-12335.                                                                                                         |
| 21 |    | +28.9 (0.5, CHCl <sub>3</sub> ), 20°C, ee = 99%                                   | Valla C, Baeza A, Menges F, <i>et al.</i> Synlett, <b>2008</b> , 2008(20): 3167-3171.                                                                                                 |
| 22 |   | 1) -3.2 (1, CHCl <sub>3</sub> ), 20°C<br>2) -7.8 (0.16, CHCl <sub>3</sub> ), 20°C | 1) He H, Ye K.Y, Wu Q.F, <i>et al.</i> Adv. Synth. Catal. <b>2012</b> , 354(6): 1084-1094.<br>2) Choi E.T, Lee M.H, Kim Y, <i>et al.</i> Tetrahedron, <b>2008</b> , 64(7): 1515-1522. |
| 23 |  | -18.7 (0.5, CHCl <sub>3</sub> ), 20°C, ee = 94%                                   | He H, Ye K.Y, Wu Q.F, <i>et al.</i> Adv. Synth. Catal. <b>2012</b> , 354(6): 1084-1094.                                                                                               |

|    |                                                                                     |                                                                                       |                                                                                                                                                                                                        |
|----|-------------------------------------------------------------------------------------|---------------------------------------------------------------------------------------|--------------------------------------------------------------------------------------------------------------------------------------------------------------------------------------------------------|
| 24 | 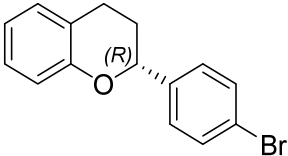   | +22.4 (0.5, CHCl <sub>3</sub> ), 20°C, ee = 91%                                       | Valla C, Baeza A, Menges F, <i>et al.</i> Synlett, <b>2008</b> , 2008(20): 3167-3171.                                                                                                                  |
| 25 |    | 1) -34.5 (0.74, CH <sub>3</sub> OH), 27°C<br>2) -23.0 (0.4, CH <sub>3</sub> OH), 21°C | 1) Liu J, Dai H.F, Wu J, <i>et al.</i> Zeitschrift für Naturforschung B, <b>2008</b> , 63(12): 1407-1410.<br>2) Achenbach H, Stöcker M, Constenla M.A. Phytochemistry, <b>1988</b> , 27(6): 1835-1841. |
| 26 |    | +190.0 (0.04, CHCl <sub>3</sub> ), 24°C                                               | Pan W.B, Chang F.R, Wei L.M, <i>et al.</i> J. Nat. Prod. <b>2003</b> , 66(2): 161-168.                                                                                                                 |
| 27 |    | +20.0 (0.3, CH <sub>3</sub> OH), 25°C                                                 | Li F.X, Wang H, Gai C.J, <i>et al.</i> J. Asian Nat. Prod. Res. <b>2018</b> , 20(1): 55-61.                                                                                                            |
| 28 |   | -31.0 (0.58, CH <sub>3</sub> OH), 27°C                                                | Liu J, Dai H.F, Wu J, <i>et al.</i> Zeitschrift für Naturforschung B, <b>2008</b> , 63(12): 1407-1410.                                                                                                 |
| 29 |  | -95.0 (0.25, CH <sub>3</sub> OH), 26°C                                                | An R.B, Jeong G.S, Kim Y.C. Chem. Pharm. Bull. <b>2008</b> , 56(12): 1722-1724.                                                                                                                        |

|    |                                                                                    |                                        |                                                                                                        |
|----|------------------------------------------------------------------------------------|----------------------------------------|--------------------------------------------------------------------------------------------------------|
| 30 | 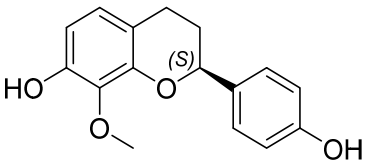  | -6.89 (0.58, CH <sub>3</sub> OH), 20°C | Camarda L, Merlini L, Nasini G, <i>Heterocycles</i> , 1983, 20(1): 39 – 43.                            |
| 31 |   | +2.2 (0.51, CH <sub>3</sub> OH), 26°C  | An R.B, Jeong G.S, Kim Y.C. <i>Chem. Pharm. Bull.</i> <b>2008</b> , 56(12): 1722-1724.                 |
| 32 |   | -85.0 (0.1, CH <sub>3</sub> OH), 25°C  | Nakashima K, Abe N, Kamiya F, <i>et al.</i> <i>Helv. Chim. Acta</i> , <b>2009</b> , 92(10): 1999-2008. |
| 33 |   | -9.4 (0.489, CH <sub>3</sub> OH), 20°C | Camarda L, Merlini L, Nasini G, <i>Heterocycles</i> , 1983, 20(1): 39 – 43.                            |
| 34 |  | -8.35 (1.16, CH <sub>3</sub> OH), 21°C | Okamoto A, Ozawa T, Imagawa H, <i>et al.</i> <i>Agric. Biol. Chem.</i> <b>1986</b> , 50(6): 1655-1656. |

35

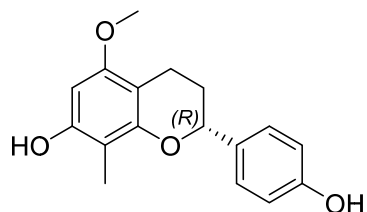+52.7 (0.19, CH<sub>3</sub>OH), 25°CAwale S, Miyamoto T, Linn T.Z, *et al.* J. Nat. Prod. **2009**, 72(9): 1631-1636.

36

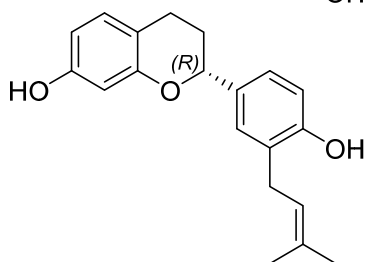+21.3 (0.08, CH<sub>3</sub>OH), 25°CXue J.J, Lei C, Wang P.P, *et al.* Fitoterapia, **2018**, 130: 37-42.

37

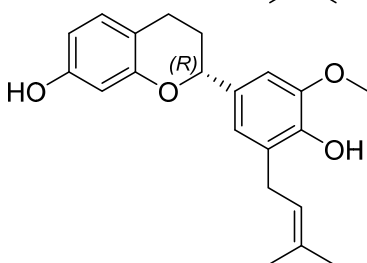+13.3 (0.04, CH<sub>3</sub>OH), 25°CXue J.J, Lei C, Wang P.P, *et al.* Fitoterapia, **2018**, 130: 37-42.

38

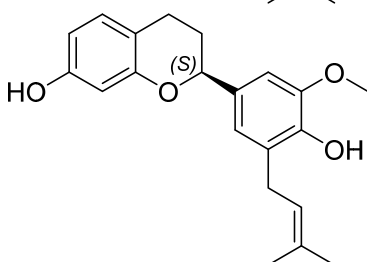-13.9 (0.04, CH<sub>3</sub>OH), 25°CXue J.J, Lei C, Wang P.P, *et al.* Fitoterapia, **2018**, 130: 37-42.

39

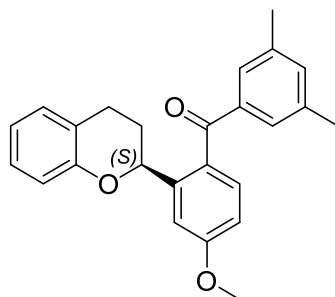-34.0 (1.48, CHCl<sub>3</sub>), 25°CSakamoto K, Nishimura T. *Adv. Synth. Catal.* **2019**, 361(9): 2124-2128.

40

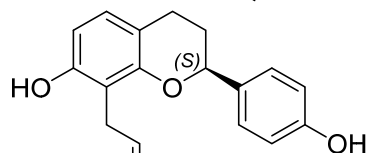1) -63.4 (0.51, CHCl<sub>3</sub>), 25°C  
2) -78.3 (0.59, CH<sub>3</sub>OH), 25°C1) Kessberg A, Metz P. *Angew. Chem. Int. Ed.* **2016**, 55(3): 1160-1163.  
2) Kessberg A, Metz P. *Angew. Chem. Int. Ed.* **2016**, 55(3): 1160-1163.

41

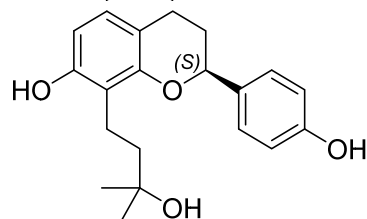1) -52.4 (0.35, CH<sub>3</sub>OH), 25°C, ee = 98%  
2) -25.3 (0.47, CH<sub>3</sub>OH), 22°C1) Kessberg A, Metz P. *Angew. Chem. Int. Ed.* **2016**, 55(3): 1160-1163.  
2) Takashima J, Komiyama K, Ishiyama H, *et al.* *Planta Med.* **2005**, 71(07): 654-658.

42

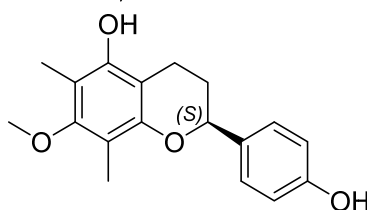-18.5 (0.5, CH<sub>3</sub>OH), 20°CChen H.Q, Zuo W.J, Wang H, *et al.* *J. Asian Nat. Prod. Res* **2012**, 14(5): 436-440.

43

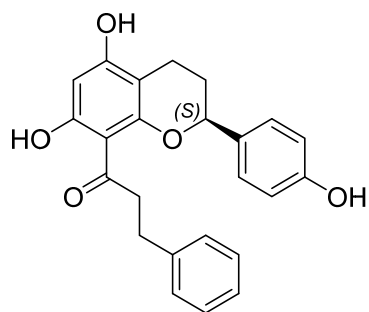

-17.4 (0.25, Acetone), 22°C

Simard F, Legault J, Lavoie S, *et al.* Phytochemistry, **2014**, 100: 141-149.

44

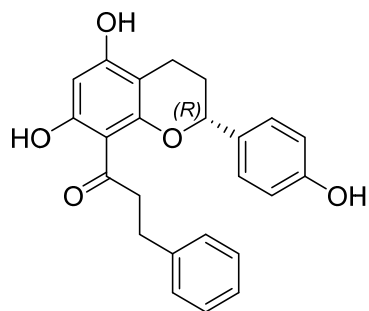

+15.5 (0.16, Acetone), 21°C

Simard F, Legault J, Lavoie S, *et al.* Phytochemistry, **2014**, 100: 141-149.

45

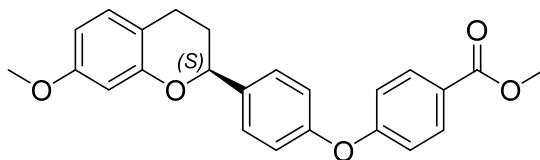-16.7 (0.59, CHCl<sub>3</sub>), 25°CTrinh P.T.N, Tri M.D, Hien D.C, *et al.* Nat. Prod. Res, **2016**, 30(7): 761-767.

46

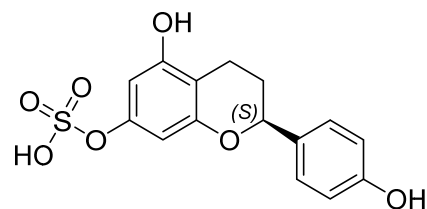-8.1 (0.09, CH<sub>3</sub>OH), 25°CKarker M, De Tommasi N, Smaoui A, *et al.* Planta Med. **2016**, 82: 1374-1380.

47

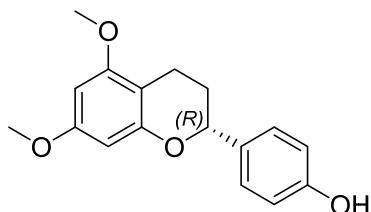+30.0 (0.15, CH<sub>3</sub>OH), 26°CSiridechakorn I, Cheenpracha S, Ritthiwigrom T, *et al.* *Phytochemistry Lett.* **2014**, 7: 186-189.

48

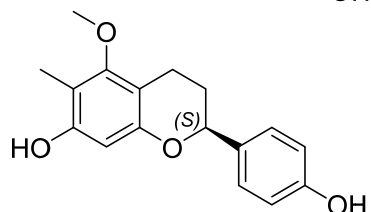+6.5 (0.2, CH<sub>3</sub>CN), 20°CWang Y.Y, Dai Y.W, Cao.J, *et al.* *Fitoterapia*, **2020**: 104549.

49

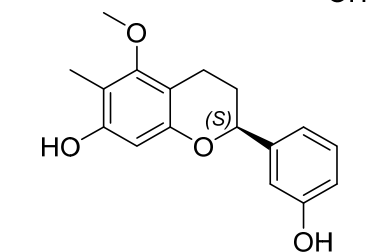+9.3 (0.15, CH<sub>3</sub>CN), 20°CWang Y.Y, Dai Y.W, Cao.J, *et al.* *Fitoterapia*, **2020**: 104549.

50

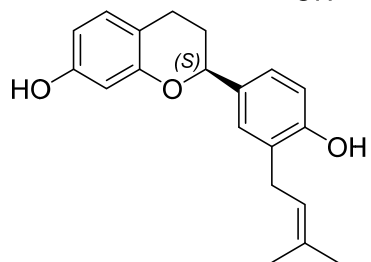

1) -22.0 (0.1, CH<sub>3</sub>OH), 25°C  
 2) -4.9 (0.25, CH<sub>3</sub>OH), 20°C

1) Xue J.J, Lei C, Wang P.P, *et al.* *Fitoterapia*, **2018**, 130: 37-42.  
 2) Lee D, Bhat K.P L, Fong H.H.S, *et al.* *J. Nat. Prod.* **2001**, 64(10): 1286-1293.

51

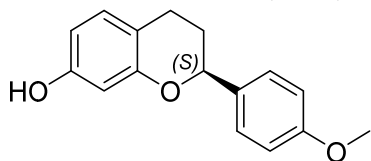

1) -14.7 (0.34, CHCl<sub>3</sub>), 22°C  
 2) -17.4, CHCl<sub>3</sub>

1) Ghosal S, Kumar Y, Chakrabarti D.K, *et al.* *Phytochemistry*, **1986**, 25(5): 1097-1102.  
 2) Takasugi M, Kumagai Y, Nagao S, *et al.* *Chem. Lett.* **1980**, 9(11): 1459-1460.

52

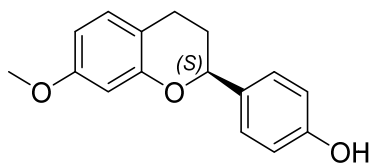

- 1) -12.0 (0.1, CH<sub>3</sub>OH), 26°C
- 2) -16.7 (0.7, CH<sub>3</sub>OH), 21°C

- 1) Min B.S, Gao J.J, Nakamura N, *et al.* Chem. Pharm. Bull. **2001**, 49(9): 1217-1219.
- 2) Achenbach H, Stöcker M, Constenla M.A. Phytochemistry, **1988**, 27(6): 1835-1841.

53

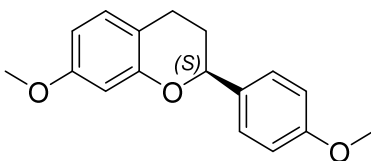

- 17.0 (0.1, CHCl<sub>3</sub>), 25°C

Nhung L.T.H, Linh N.T.T, Cham B.T, *et al.* Nat. Prod. Res. **2019**: 1-8.

54

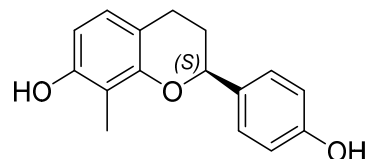

- 1) -49.2 (0.12, CHCl<sub>3</sub>)
- 2) +31.6 (0.27, CH<sub>3</sub>OH), 20°C

- 1) Ioset J.R, Marston A, Gupta M.P, *et al.* Fitoterapia, **2001**, 72(1): 35-39.
- 2) Camarda L, Merlini L, Nasini G, Heterocycles, 1983, 20(1): 39 – 43.

55

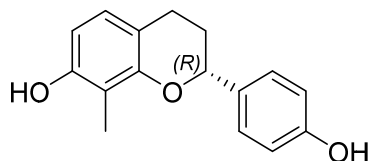

- 1) +79.2 (0.4, CHCl<sub>3</sub>), 25°C
- 2) +15.0 (0.41, CHCl<sub>3</sub>), 27°C

- 1) Li F.X, Wang H, Gai C.J, *et al.* J. Asian Nat. Prod. Res. **2018**, 20(1): 55-61.
- 2) Liu J, Dai H.F, Wu J, *et al.* Zeitschrift für Naturforschung B, **2008**, 63(12): 1407-1410.

56

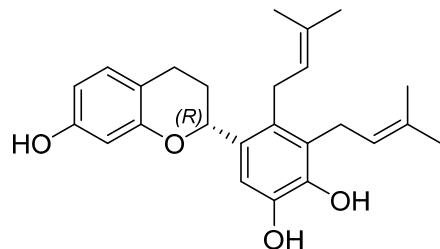

- +2.5 (3.05, CHCl<sub>3</sub>), 28°C

Lee H.J, Lee Y.J, Ryu K.H, *et al.* Bioorg. Med. Chem. Lett. **2010**, 20(12): 3764-3767.

57

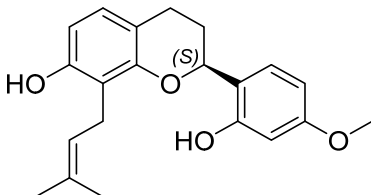

- 23.7 (0.1, CH<sub>3</sub>OH), 20°C

Park J.H, Lee D.Y, Yun P, *et al.* J. Asian Nat. Prod. Res. **2011**, 13(04): 377-382.

58

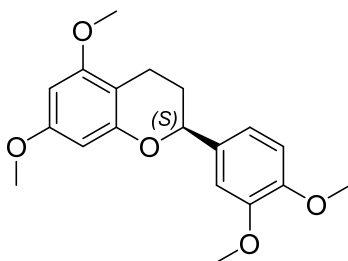

-15.3 (1.0, Acetone), 20°C

Weinges K, Schick H, Zoellner P,  
Liebigs Annalen der Chemie, **1992**, 3, 293 - 296

59

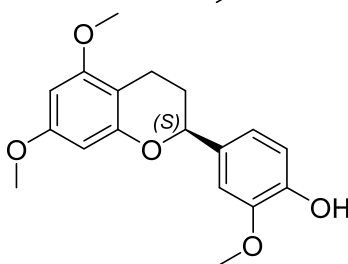-4.15 (0.25, CHCl<sub>3</sub>), 23°C

Garo E, Maillard M, Antus S, *et al.* Phytochemistry,  
**1996**, 43(6): 1265-1269.

60

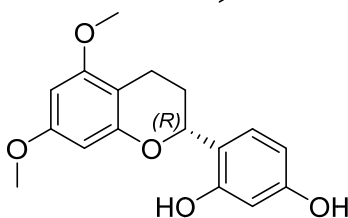+71.1 (0.15, CH<sub>3</sub>OH), 26°C

Siridechakorn I, Cheenpracha S, Ritthiwigrom T, *et al.*  
Phytochemistry Lett. **2014**, 7: 186-189.

61

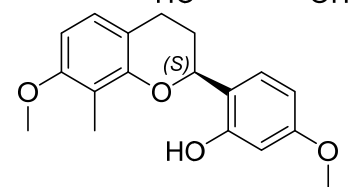-25.8 (0.7, CH<sub>3</sub>OH), 20°C

Tang B.Q, Huang S.S, Liang Y.E, *et al.* Nat. Prod. Res.  
**2017**, 31(13): 1561-1565.

62

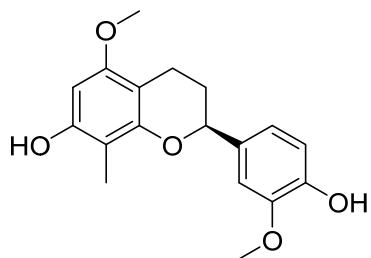-8.6 (0.1, CH<sub>3</sub>OH), 10°CZaki A.A, Ross S.A, El-Amier Y.A, *et al.* Phytochemistry Lett. **2018**, 26: 159-163.

63

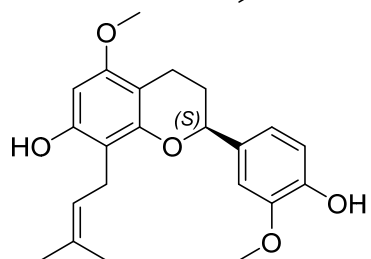-17.0 (0.1, CH<sub>3</sub>OH), 10°CZaki A.A, Ross S.A, El-Amier Y.A, *et al.* Phytochemistry Lett. **2018**, 26: 159-163.

64

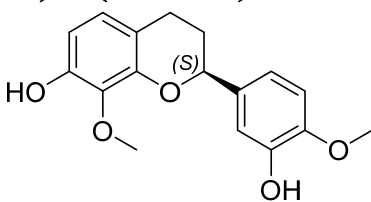-7.3 (0.1, CH<sub>3</sub>OH), 10°CZaki A.A, Ross S.A, El-Amier Y.A, *et al.* Phytochemistry Lett. **2018**, 26: 159-163.

65

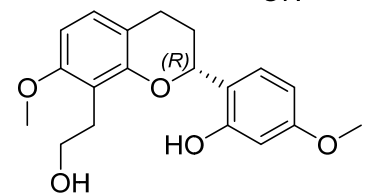+17.2 (0.1, CH<sub>3</sub>OH)Zhang H.R, Li M, Wang M.M, *et al.* Phytochemistry Lett. **2019**, 29: 84-90.

66

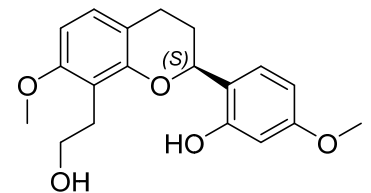-15.5 (0.1, CH<sub>3</sub>OH)Zhang H.R, Li M, Wang M.M, *et al.* Phytochemistry Lett. **2019**, 29: 84-90.

67

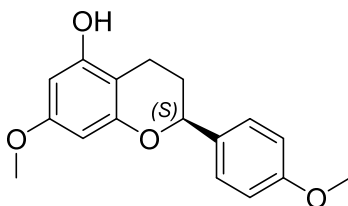-11.3 (0.34, CH<sub>3</sub>OH), 22°CGhosal S, Kumar Y, Chakrabarti D.K, *et al.* Phytochemistry, **1986**, 25(5): 1097-1102.

68

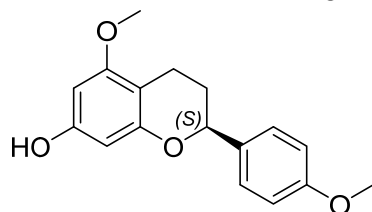-6.8 (0.47, CHCl<sub>3</sub>), 22°CGhosal S, Kumar Y, Chakrabarti D.K, *et al.* Phytochemistry, **1986**, 25(5): 1097-1102.

69

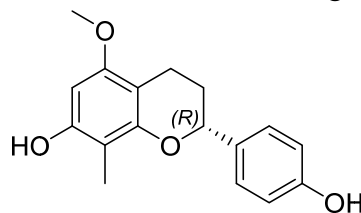+52.7 (0.19, CH<sub>3</sub>OH), 25°CAwale S, Miyamoto T, Linn T.Z, *et al.* J. Nat. Prod. **2009**, 72(9): 1631-1636.

70

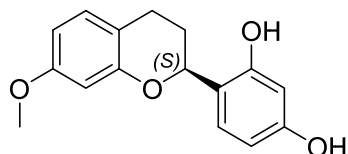-21.0 (0.1, CH<sub>3</sub>OH), 25°CNhung L.T.H, Linh N.T.T, Cham B.T, *et al.* Nat. Prod. Res. **2019**: 1-8.

71

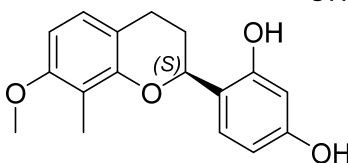-22.6 (0.8, CH<sub>3</sub>OH), 20°CTang B.Q, Huang S.S, Liang Y.E, *et al.* Nat. Prod. Res. **2017**, 31(13): 1561-1565.

72

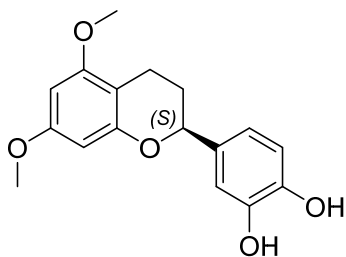-53.0 (0.36, CHCl<sub>3</sub>), 20°CMoosophon P, Kanokmedhakul S, Kanokmedhakul K, *et al.* J. Nat. Prod. **2013**, 76(7): 1298-1302.

73

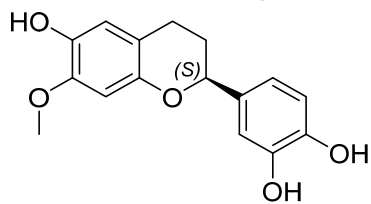-33.2 (0.52, CHCl<sub>3</sub>), 20°CMoosophon P, Kanokmedhakul S, Kanokmedhakul K, *et al.* J. Nat. Prod. **2013**, 76(7): 1298-1302.

74

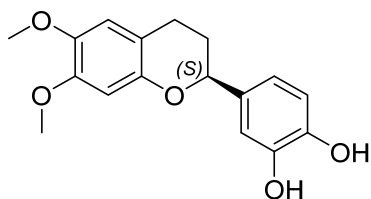-27.4 (0.37, CHCl<sub>3</sub>), 20°CMoosophon P, Kanokmedhakul S, Kanokmedhakul K, *et al.* J. Nat. Prod. **2013**, 76(7): 1298-1302.

75

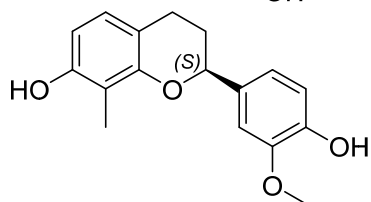-45.78 (0.68, CH<sub>3</sub>OH), 20°C

Camarda L, Merlini L, Nasini G, Heterocycles, 1983, 20(1): 39 – 43.

76

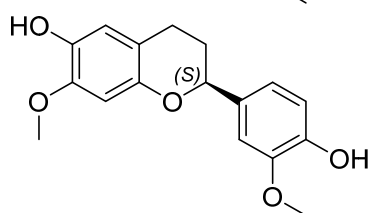-30.8 (0.27, CHCl<sub>3</sub>), 20°CMoosophon P, Kanokmedhakul S, Kanokmedhakul K, *et al.* J. Nat. Prod. **2013**, 76(7): 1298-1302.

77

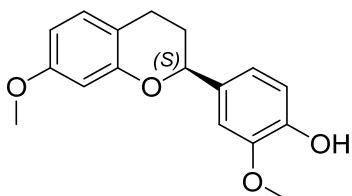-26.0 (0.13, CH<sub>3</sub>OH), 21°C

Achenbach H, Stöcker M, Constenla M.A. *Phytochemistry*, **1988**, 27(6): 1835-1841.

78

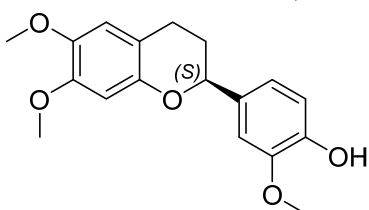-37.0 (0.2, CHCl<sub>3</sub>), 20°C

Moosophon P, Kanokmedhakul S, Kanokmedhakul K, *et al.* *J. Nat. Prod.* **2013**, 76(7): 1298-1302.

79

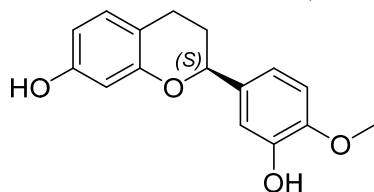

1) -36.7 (0.37, CH<sub>3</sub>OH), 25°C, ee = 99%  
2) -45.5 (0.3, CH<sub>3</sub>OH), 24°C

1) Keßberg A, Metz P. *Org. Lett.* **2016**, 18(24): 6500-6503.  
2) Masaoud M, Ripperger H, Porzel A, *et al.* *Phytochemistry*, **1995**, 38(3): 745-749.

80

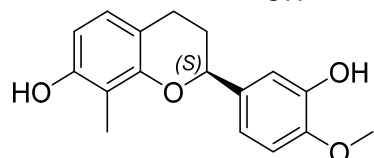

1) -20.0 (0.52, CHCl<sub>3</sub>), 27°C  
2) -31.0 (1.44, CHCl<sub>3</sub>), 20°C

1) Liu J, Dai H.F, Wu J, *et al.* *Zeitschrift für Naturforschung B*, **2008**, 63(12): 1407-1410.  
2) Numata A, Takemura T, Ohbayashi H, *et al.* *Chem. Pharm. Bull.* **1983**, 31(6): 2146-2149.

81

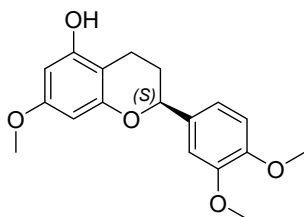

-13.69 (0.16, Acetone), 20°C

Li L.J, Zhang Y, Zhang P, *et al.* *J. Asian Nat. Prod. Res.* **2011**, 13(04): 367-372.

|    |                                                                                     |                                                  |                                                                                                |
|----|-------------------------------------------------------------------------------------|--------------------------------------------------|------------------------------------------------------------------------------------------------|
| 82 | 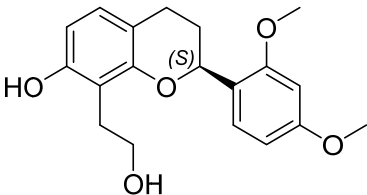   | -16.2 (0.07, CH <sub>3</sub> OH)                 | Zhang H.R, Li M, Wang M.M, <i>et al.</i> Phytochemistry Lett. <b>2019</b> , 29: 84-90.         |
| 83 |    | -28.3 (0.1, CH <sub>3</sub> OH), 20°C            | Zhang H.R, Li M, Wang M.M, <i>et al.</i> Phytochemistry Lett. <b>2019</b> , 29: 84-90.         |
| 84 |    | +8.0 (0.1, CH <sub>3</sub> OH), 20°C             | Zhang H.R, Li M, Wang M.M, <i>et al.</i> Phytochemistry Lett. <b>2019</b> , 29: 84-90.         |
| 85 |   | -26.2 (0.9, CH <sub>3</sub> OH), 26°C            | Morikawa T, Xu F, Matsuda H, <i>et al.</i> Chem. Pharm. Bull, <b>2006</b> , 54(11): 1530-1534. |
| 86 |  | -193.0 (0.5, CHCl <sub>3</sub> ), 25°C, ee = 92% | Sakamoto K, Nishimura T. Adv. Synth. Catal. <b>2019</b> , 361(9): 2124-2128.                   |

|    |                                                                                     |                                                   |                                                                              |
|----|-------------------------------------------------------------------------------------|---------------------------------------------------|------------------------------------------------------------------------------|
| 87 | 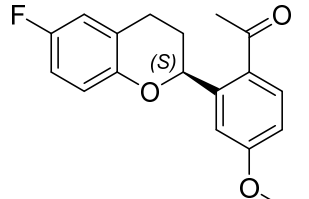   | -184.0 (1.57, CHCl <sub>3</sub> ), 25°C, ee = 85% | Sakamoto K, Nishimura T. Adv. Synth. Catal. <b>2019</b> , 361(9): 2124-2128. |
| 88 |    | -123.0 (1.1, CHCl <sub>3</sub> ), 25°C, ee = 88%  | Sakamoto K, Nishimura T. Adv. Synth. Catal. <b>2019</b> , 361(9): 2124-2128. |
| 89 |    | -174.0 (1.2, CHCl <sub>3</sub> ), 25°C, ee = 84%  | Sakamoto K, Nishimura T. Adv. Synth. Catal. <b>2019</b> , 361(9): 2124-2128. |
| 90 |   | -158.0 (0.89, CHCl <sub>3</sub> ), 25°C, ee = 94% | Sakamoto K, Nishimura T. Adv. Synth. Catal. <b>2019</b> , 361(9): 2124-2128. |
| 91 |  | -131.0 (0.74, CHCl <sub>3</sub> ), 25°C, ee = 87% | Sakamoto K, Nishimura T. Adv. Synth. Catal. <b>2019</b> , 361(9): 2124-2128. |

92

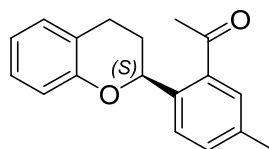+8.0 (1.16, CHCl<sub>3</sub>), 25°C, ee = 77%Sakamoto K, Nishimura T. Adv. Synth. Catal. **2019**, 361(9): 2124-2128.

93

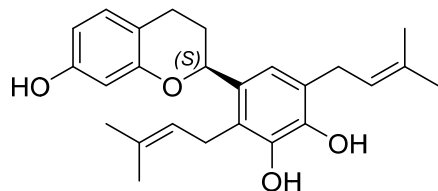1) -10.7 (0.13, CHCl<sub>3</sub>)  
2) -11.0 (0.13, CHCl<sub>3</sub>), 17°C1) Park S, Fudhaili A, Oh S.S, *et al.* Phytomedicine, **2016**, 23(12): 1462-1468.  
2) Ikuta J, Hano Y, Nomura T. Heterocycles (Sendai), **1985**, 23(11): 2835-2842.

94

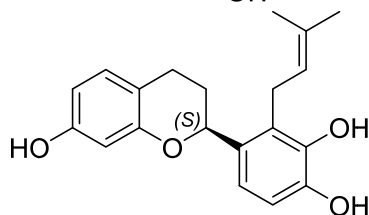-29.0 (0.1, CH<sub>3</sub>OH), 20°CSun Q, Yao G.D, Song X.Y, *et al.* Eur. J. Med. Chem. **2017**, 133: 1-10.

95

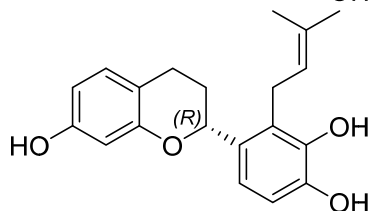1) +29.0 (0.1, CH<sub>3</sub>OH), 20°C  
2) +4.3 (3.0, CH<sub>3</sub>OH), 24°C1) Sun Q, Yao G.D, Song X.Y, *et al.* Eur. J. Med. Chem. **2017**, 133: 1-10.  
2) Lee H.J, Lee Y.J, Ryu K.H, *et al.* Bioorg. Med. Chem. Lett. **2010**, 20(12): 3764-3767.

96

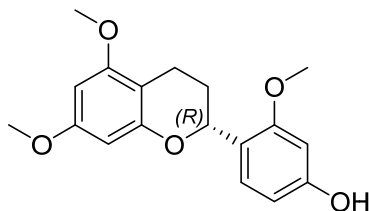+23.7 (0.23, CH<sub>3</sub>OH)Jiang Z.Y, Bai X.S, Liang H, *et al.* J. Asian Nat. Prod. Res. **2013**, 15(9): 979-984.

|     |                                                                                    |                                                   |                                                                                           |
|-----|------------------------------------------------------------------------------------|---------------------------------------------------|-------------------------------------------------------------------------------------------|
| 97  | 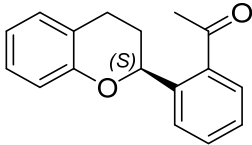  | -92.0 (1.08, CHCl <sub>3</sub> ), 20°C, ee = 84%  | Ebe Y, Onoda M, Nishimura T, <i>et al.</i> Angew. Chem. Int. Ed. 2017, 56(20): 5607-5611. |
| 98  |   | -115.0 (1.49, CHCl <sub>3</sub> ), 20°C, ee = 81% | Sakamoto K, Nishimura T. Adv. Synth. Catal. <b>2019</b> , 361(9): 2124-2128.              |
| 99  |   | -199.0 (0.98, CHCl <sub>3</sub> ), 25°C           | Sakamoto K, Nishimura T. Adv. Synth. Catal. <b>2019</b> , 361(9): 2124-2128.              |
| 100 |   | -88.0 (1.14, CHCl <sub>3</sub> ), 25°C            | Sakamoto K, Nishimura T. Adv. Synth. Catal. <b>2019</b> , 361(9): 2124-2128.              |
| 101 |  | -139.0 (0.62, CHCl <sub>3</sub> ), 25°C           | Sakamoto K, Nishimura T. Adv. Synth. Catal. <b>2019</b> , 361(9): 2124-2128.              |

|     |                                                                                     |                                                                                       |                                                                                                                                                                                                        |
|-----|-------------------------------------------------------------------------------------|---------------------------------------------------------------------------------------|--------------------------------------------------------------------------------------------------------------------------------------------------------------------------------------------------------|
| 102 | 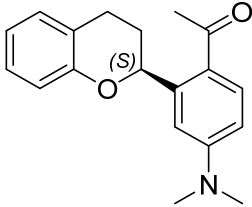   | -368.0 (1.42, CHCl <sub>3</sub> ), 25°C, ee = 94%                                     | Sakamoto K, Nishimura T. Adv. Synth. Catal. <b>2019</b> , 361(9): 2124-2128.                                                                                                                           |
| 103 |    | -21.2 (0.4, CH <sub>3</sub> OH), 29°C                                                 | Morikawa T, Xu F, Matsuda H, <i>et al.</i> Chem. Pharm. Bull, <b>2006</b> , 54(11): 1530-1534.                                                                                                         |
| 104 |    | -15.3 (1, Acetone), 20°C                                                              | Weinges K, Schick H, Zoellner P, Liebigs Annalen der Chemie, <b>1992</b> , 3: 293 - 296                                                                                                                |
| 105 |   | 1) -12.4 (0.3, CH <sub>3</sub> OH), 22°C<br>2) -10.8 (0.28, CH <sub>3</sub> OH), 22°C | 1) GHOSAL S, Saini K.S, Sinha B.N. J. Chem. Res. Synopses (Print), <b>1983</b> (12): 2601 – 2610.<br>2) GHOSAL S, Saini K.S, Sinha B.N. J. Chem. Res. Synopses (Print), <b>1983</b> (12): 2601 – 2610. |
| 106 |  | -6.5 (0.6, Acetone), 25°C                                                             | Hu X, Wu J.W, Wang M, <i>et al.</i> J. Nat. Prod. <b>2012</b> , 75(1): 82-87.                                                                                                                          |

|     |                                                                                     |                                                   |                                                                                        |
|-----|-------------------------------------------------------------------------------------|---------------------------------------------------|----------------------------------------------------------------------------------------|
| 107 | 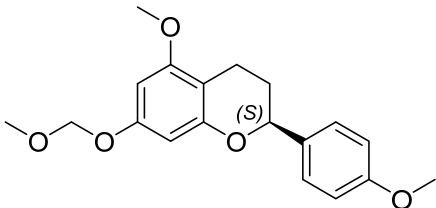   | +5.9 (0.31, CH <sub>3</sub> CN), 20°C             | Yuan H, Bi K, Chang W, <i>et al.</i> Tetrahedron, <b>2014</b> , 70(47): 9084-9092.     |
| 108 |    | -43.2 (0.12, CH <sub>3</sub> OH), 25°C            | Sun Q, Li F.F, Wang D, <i>et al.</i> RSC Adv. <b>2016</b> , 6(61): 55919-55929.        |
| 109 |    | -36.5 (0.4, CHCl <sub>3</sub> ), 20°C, ee = 89%   | Wang Y, Franzen R. Synlett, <b>2012</b> , 23(06): 925-929.                             |
| 110 |    | -23.0 (0.2, CHCl <sub>3</sub> ), 21°C             | Achenbach H, Stöcker M, Constenla M.A. Phytochemistry, <b>1988</b> , 27(6): 1835-1841. |
| 111 |   | -157.0 (0.91, CHCl <sub>3</sub> ), 25°C, ee = 76% | Sakamoto K, Nishimura T. Adv. Synth. Catal. <b>2019</b> , 361(9): 2124-2128.           |
| 112 |  | -10.6 (0.5, CHCl <sub>3</sub> ), 20°C             | Xu Q, Xie H, Wu P, <i>et al.</i> Food chem. <b>2013</b> , 139(1-4): 149-154.           |

|     |                                                                                     |                                                   |                                                                                                  |
|-----|-------------------------------------------------------------------------------------|---------------------------------------------------|--------------------------------------------------------------------------------------------------|
| 113 | 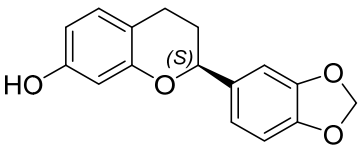   | -20.9 (0.2, CHCl <sub>3</sub> ), 24°C             | Valsaraj R, Pushpangadan P, Smitt U W, <i>et al.</i> J. Nat. Prod. <b>1997</b> , 60(7): 739-742. |
| 114 |    | -7.4 (0.5, CDCl <sub>3</sub> ), 25°C              | Ho J.C, Chen C.M. Phytochemistry, <b>2002</b> , 61(4): 405-408.                                  |
| 115 |    | -259.0 (0.89, CHCl <sub>3</sub> ), 25°C, ee = 82% | Sakamoto K, Nishimura T. Adv. Synth. Catal. <b>2019</b> , 361(9): 2124-2128.                     |
| 116 |    | -266.0 (0.74, CHCl <sub>3</sub> ), 25°C, ee = 91% | Sakamoto K, Nishimura T. Adv. Synth. Catal. <b>2019</b> , 361(9): 2124-2128.                     |
| 117 |   | -242.0 (0.91, CHCl <sub>3</sub> ), 25°C, ee = 90% | Sakamoto K, Nishimura T. Adv. Synth. Catal. <b>2019</b> , 361(9): 2124-2128.                     |
| 118 |  | -77.0 (0.53, CHCl <sub>3</sub> ), 25°C, ee = 91%  | Sakamoto K, Nishimura T. Adv. Synth. Catal. <b>2019</b> , 361(9): 2124-2128.                     |

119

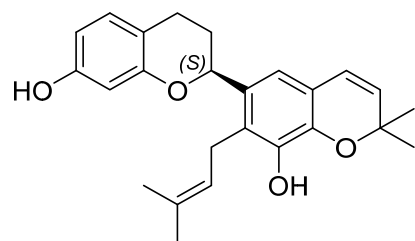

- 1) -34.8 (0.15, CHCl<sub>3</sub>), 20°C
- 2) -20.0 (0.38, CHCl<sub>3</sub>), 24°C

- 1) Sun Q, Yao G.D, Song X.Y, *et al.* Eur. J. Med. Chem. **2017**, 133: 1-10.
- 2) Ikuta J, Hano Y, Nomura T. Heterocycles (Sendai), 1985, 23(11): 2835-2842.

120

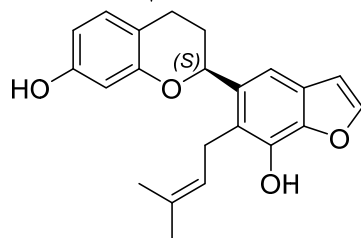

- 1) -12.2 (0.22, CHCl<sub>3</sub>), 22°C
- 2) -8.7 (0.1, CH<sub>3</sub>OH), 20°C
- 3) -27.5 (0.12, CH<sub>3</sub>OH), 25°C

- 1) Geng C, Chen J. J, Yan M.H, *et al.* CN109172640, **2019**.
- 2) Yang Y.N, An Y.W, Zhan Z.L, *et al.* RSC Adv. 2017, 7(2): 805 - 812.
- 3) Sun Q, Li F.F, Wang D, *et al.* RSC Adv. **2016**, 6(61): 55919-55929.

121

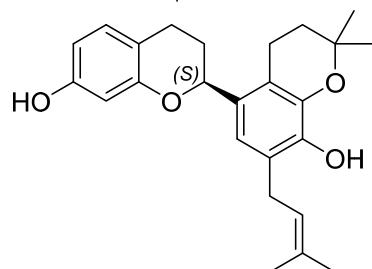

- 44.8 (0.1, CH<sub>3</sub>OH), 25°C

- Sun Q, Li F.F, Wang D, *et al.* RSC Adv. **2016**, 6(61): 55919-55929.

122

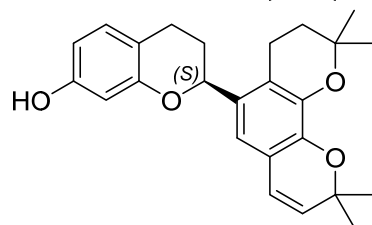

- 44.3 (0.11, CH<sub>3</sub>OH), 25°C

- Sun Q, Li F.F, Wang D, *et al.* RSC Adv. **2016**, 6(61): 55919-55929.

123

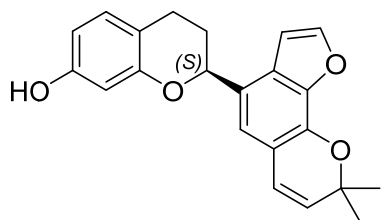-34.8 (0.07, CH<sub>3</sub>OH), 25°CSun Q, Li F.F, Wang D, et al. RSC Adv. **2016**, 6(61): 55919-55929.

124

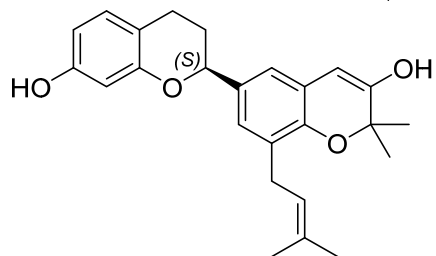-39.1 (0.09, CH<sub>3</sub>OH), 25°CSun Q, Li F.F, Wang D, et al. RSC Adv. **2016**, 6(61): 55919-55929.

125

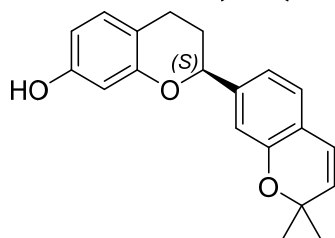-31.5 (0.13, CH<sub>3</sub>OH), 25°CSun Q, Li F.F, Wang D, et al. RSC Adv. **2016**, 6(61): 55919-55929.

126

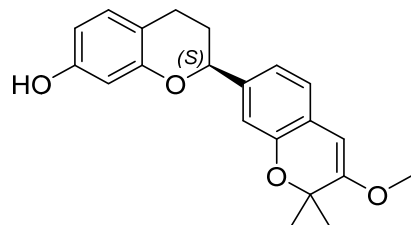-39.6 (0.05, CH<sub>3</sub>OH), 25°CSun Q, Li F.F, Wang D, et al. RSC Adv. **2016**, 6(61): 55919-55929.

|     |                                                                                     |                                        |                                                                                     |
|-----|-------------------------------------------------------------------------------------|----------------------------------------|-------------------------------------------------------------------------------------|
| 127 | 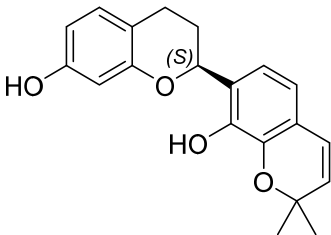   | -40.5 (0.08, CH <sub>3</sub> OH), 25°C | Sun Q, Li F.F, Wang D, et al. RSC Adv. <b>2016</b> , 6(61): 55919-55929.            |
| 128 |    | -29.8 (0.1, CH <sub>3</sub> OH), 25°C  | Sun Q, Li F.F, Wang D, et al. RSC Adv. <b>2016</b> , 6(61): 55919-55929.            |
| 129 |    | -25.4 (0.09, CH <sub>3</sub> OH), 25°C | Sun Q, Li F.F, Wang D, et al. RSC Adv. <b>2016</b> , 6(61): 55919-55929.            |
| 130 |   | +33.4 (0.08, CH <sub>3</sub> OH), 20°C | Sun Q, Yao G.D, Song X.Y, <i>et al.</i> Eur. J. Med. Chem. <b>2017</b> , 133: 1-10. |
| 131 |  | +30.8 (0.08, CH <sub>3</sub> OH), 20°C | Sun Q, Yao G.D, Song X.Y, <i>et al.</i> Eur. J. Med. Chem. <b>2017</b> , 133: 1-10. |

|     |  |                                                |                                                                                                   |
|-----|--|------------------------------------------------|---------------------------------------------------------------------------------------------------|
| 132 |  | -32.0 (0.09, CH <sub>3</sub> OH), 20°C         | Sun Q, Yao G.D, Song X.Y, <i>et al.</i> Eur. J. Med. Chem. <b>2017</b> , 133: 1-10.               |
| 133 |  | -41.4 (0.06, CH <sub>3</sub> OH), 20°C         | Sun Q, Yao G.D, Song X.Y, <i>et al.</i> Eur. J. Med. Chem. <b>2017</b> , 133: 1-10.               |
| 134 |  | +41.0 (0.06, CH <sub>3</sub> OH), 20°C         | Sun Q, Yao G.D, Song X.Y, <i>et al.</i> Eur. J. Med. Chem. <b>2017</b> , 133: 1-10.               |
| 135 |  | -122.0 (1.01, CHCl <sub>3</sub> ), 20°C        | Ebe Y, Onoda M, Nishimura T, <i>et al.</i> Angew. Chem. Int. Ed. <b>2017</b> , 56(20): 5607-5611. |
| 136 |  | -4.7 (0.9, CHCl <sub>3</sub> ), 20°C, ee = 97% | Valla C, Baeza A, Menges F, <i>et al.</i> Synlett, <b>2008</b> , 2008(20): 3167-3171.             |

137

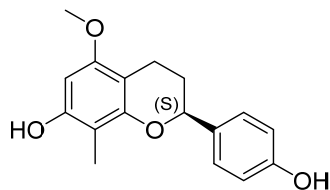-20.6 (0.1, CH<sub>3</sub>OH), 25°C

Lee J. W., Kim J. G. Lee, D. et al. *Phytochem. Lett.* **2021**, 44, 149-153.

138

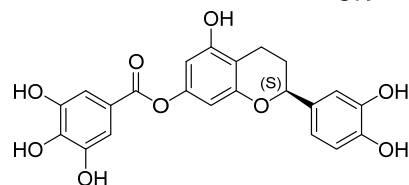1) -45.3 (0.1, CH<sub>3</sub>OH), 23°C2) -26 (0.2, CH<sub>3</sub>OH), 25°C

1) Rajachan O. A., Hongtanee L., Chalermesaen K., Kanokmedhakul K., et al. *J. Asian Nat. Prod. Res.* **2020**, 22(5), 405-412.

2) Jung W. H., Kim K. H., Pang C., et al. *J. Nat. Prod.* **2020**, 83(7), 2261-2268.

139

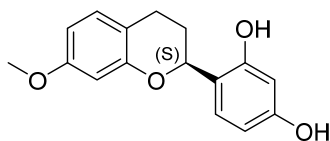-21 (0.1, CH<sub>3</sub>OH), 25°C

Nhung L. T. H., Linh N. T. T., Cham B. T., et al. *Nat. Prod. Res.* **2021**, 35(18), 3063-3070.

**Table S3.** Experimental  $[\alpha]_D$  values for 2-carboxyl chromanes

| Entry | Structure | $[\alpha]_D$                                                                                                                      | $^1\text{H}$ NMR data for the H2 atom                                                      | Ref.                                                                                                                                                                                                                                                            |
|-------|-----------|-----------------------------------------------------------------------------------------------------------------------------------|--------------------------------------------------------------------------------------------|-----------------------------------------------------------------------------------------------------------------------------------------------------------------------------------------------------------------------------------------------------------------|
| 1     |           | +5.95 (1.058, CH <sub>3</sub> OH), 20°C                                                                                           | 4.76 (dd, $J = 6.43, 3.96$ Hz, 1H)                                                         | Dolle R.E, Chu G.H. U.S. Patent 7,034,051[P]. 2006-4-25.                                                                                                                                                                                                        |
| 2     |           | 1) -5.97 (1.039, CH <sub>3</sub> OH), 20°C<br>2) -6.3 (1.05, CH <sub>3</sub> OH), 20°C<br>3) -6.8 (1.0, CH <sub>3</sub> OH), 20°C | 1) 4.76 (dd, $J = 6.43, 3.96$ Hz, 1H)<br>2) 4.76 (dd, $J = 7.6, 3.5$ , 1H)<br>3) Not found | 1) Dolle R.E, Chu G.H. U.S. Patent 7,034,051[P]. 2006-4-25.<br>2) Kim D.W, Alam M.M, Lee Y.H, <i>et al.</i> Tetrahedron: Asymmetry, <b>2015</b> , 26(17): 912-917.<br>3) Shukla M.R, Sarde A.G, Loriya R.M, <i>et al.</i> U.S. Patent 9,163,001[P]. 2015-10-20. |
| 3     |           | 1) +14.4 (1, DMF), 25°C, ee = 95%<br>2) +14.1 (1, DMF), 23°C                                                                      | 1) 4.74 (dd, $J = 8.1, 3.5$ Hz, 1H)<br>2) 4.74 (dd, $J = 7.8, 3.5$ Hz, 1H)                 | 1) Song X.G, Zhu S.F, Xie X.L, <i>et al.</i> Angew. Chem. Int. Ed. <b>2013</b> , 52(9): 2555-2558.<br>2) Song S, Zhu S.F, Pu L.Y, <i>et al.</i> Angew. Chem. Int. Ed. <b>2013</b> , 52(23): 6072-6075.                                                          |
| 4     |           | -12.6 (1, DMF), 20°C, ee = 99%                                                                                                    | 4.74 (dd, $J = 7.6, 3.5$ Hz, 1H)                                                           | Kim D.W, Alam M.M, Lee Y.H, <i>et al.</i> Tetrahedron: Asymmetry, <b>2015</b> , 26(17): 912-917.                                                                                                                                                                |
| 5     |           | -54.5 (1.25, CHCl <sub>3</sub> ), 20°C, ee = 98%                                                                                  | 4.73 (dd, $J = 7.6, 3.5$ Hz, 1H)                                                           | Lee Y.S, Lee Y.H, Kim D.W, Patent, KR2017/37154, <b>2017</b> .                                                                                                                                                                                                  |
| 6     |           | -11.2 (1.35, CHCl <sub>3</sub> ), 20°C, ee = 99%                                                                                  | 4.71 (dd, $J = 7.6, 3.5$ Hz, 1H)                                                           | Kim D.W, Alam M.M, Lee Y.H, <i>et al.</i> Tetrahedron: Asymmetry, <b>2015</b> , 26(17): 912-917.                                                                                                                                                                |
| 7     |           | +16.3 (2.1, CH <sub>3</sub> OH)                                                                                                   | Not found                                                                                  | Loiodice F, Longo A, Bianco P, <i>et al.</i> Tetrahedron: Asymmetry, <b>1995</b> , 6(4): 1001-1011.                                                                                                                                                             |

|    |                                                                                     |                                                                                            |                                                                                      |                                                                                                                                                                                                 |
|----|-------------------------------------------------------------------------------------|--------------------------------------------------------------------------------------------|--------------------------------------------------------------------------------------|-------------------------------------------------------------------------------------------------------------------------------------------------------------------------------------------------|
| 8  | 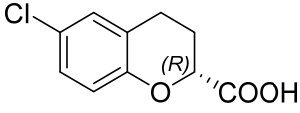   | 1) -15.5 (1.0, CH <sub>3</sub> OH), 20°C, ee = 98%<br>2) -16.4 (2.1, CH <sub>3</sub> OH)   | 1) 4.76 (dd, <i>J</i> = 7.6, 3.5 Hz, 1H)<br>2) Not found                             | 1) Kim D.W, Alam M.M, Lee Y.H, et al. Tetrahedron: Asymmetry, <b>2015</b> , 26(17): 912-917.<br>2) Loiodice F, Longo A, Bianco P, et al. Tetrahedron: Asymmetry, <b>1995</b> , 6(4): 1001-1011. |
| 9  |    | -7.8 (0.5, CHCl <sub>3</sub> ), 20°C, ee = 99%                                             | 4.77 (dd, <i>J</i> = 7.6, 3.5 Hz, 1H)                                                | Kim D.W, Alam M.M, Lee Y.H, et al. Tetrahedron: Asymmetry, <b>2015</b> , 26(17): 912-917.                                                                                                       |
| 10 |    | +43.0 (1.4, CHCl <sub>3</sub> ), 20°C                                                      | 4.44 (dd, <i>J</i> = 8.7, 3.3 Hz, 1H)                                                | Carreño M.C, Hernández-Torres G, Urbano A, et al. Eur. J. Org. Chem. <b>2008</b> , 2008(12): 2035-2038.                                                                                         |
| 11 |    | -38.6 (0.53, CHCl <sub>3</sub> ), 20°C                                                     | 4.44 (dd, <i>J</i> = 8.7, 3.3 Hz, 1H)                                                | Carreño M.C, Hernández-Torres G, Urbano A, et al. Eur. J. Org. Chem. <b>2008</b> , 2008(12): 2035-2038.                                                                                         |
| 12 |    | -6.9 (3, CHCl <sub>3</sub> ), 20°C, ee = 99%                                               | 4.73 (dd, <i>J</i> = 7.6, 3.5 Hz, 1H)                                                | Kim D.W, Alam M.M, Lee Y.H, et al. Tetrahedron: Asymmetry, <b>2015</b> , 26(17): 912-917.                                                                                                       |
| 13 |    | 1) -10.3 (0.5, CHCl <sub>3</sub> ), 20°C, ee = 99%<br>2) -8.21 (3.8, EtOH), 25°C, ee = 96% | 1) 4.70 (dd, <i>J</i> = 7.6, 3.5 Hz, 1H)<br>2) 4.69 (dd, <i>J</i> = 7.3, 3.7 Hz, 1H) | 1) Kim D.W, Alam M.M, Lee Y.H, et al. Tetrahedron: Asymmetry, <b>2015</b> , 26(17): 912-917.<br>2) Song X.G, Zhu S.F, Xie X.L, et al. Angew. Chem. Int. Ed. <b>2013</b> , 52(9): 2555-2558.     |
| 14 |   | +11.6 (1.8, CHCl <sub>3</sub> ), 20°C, ee = 99%                                            | 4.71 (dd, <i>J</i> = 7.6, 3.5 Hz, 1H)                                                | Kim D.W, Alam M.M, Lee Y.H, et al. Tetrahedron: Asymmetry, <b>2015</b> , 26(17): 912-917.                                                                                                       |
| 15 |  | -5.6 (0.2, CHCl <sub>3</sub> ), 20°C, ee = 99%                                             | 4.68 (dd, <i>J</i> = 7.6, 3.5 Hz, 1H)                                                | Kim D.W, Alam M.M, Lee Y.H, et al. Tetrahedron: Asymmetry, <b>2015</b> , 26(17): 912-917.                                                                                                       |

|    |                                                                                     |                                                                                          |                                       |                                                                                                                                                                                                                    |
|----|-------------------------------------------------------------------------------------|------------------------------------------------------------------------------------------|---------------------------------------|--------------------------------------------------------------------------------------------------------------------------------------------------------------------------------------------------------------------|
| 16 | 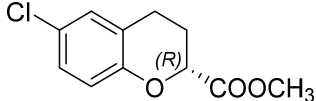   | -6.9 (3, CHCl <sub>3</sub> ), 20°C, ee = 99%                                             | 4.73 (dd, <i>J</i> = 7.6, 3.5 Hz, 1H) | Kim D.W, Alam M.M, Lee Y.H, <i>et al.</i> Tetrahedron: Asymmetry, <b>2015</b> , 26(17): 912-917.                                                                                                                   |
| 17 |    | -7.1 (0.5, CHCl <sub>3</sub> ), 20°C, ee = 98%                                           | 4.73 (dd, <i>J</i> = 7.6, 3.5 Hz, 1H) | Kim D.W, Alam M.M, Lee Y.H, <i>et al.</i> Tetrahedron: Asymmetry, <b>2015</b> , 26(17): 912-917.                                                                                                                   |
| 18 |    | 1) -20.1 (1, CHCl <sub>3</sub> )<br>2) -20.2 (1, CHCl <sub>3</sub> ), 25°C               | 1) Not found<br>2) Not found          | 1) van Wieringen J.P, Shalgunov V, Janssen H.M, <i>et al.</i> J. Med. Chem. <b>2014</b> , 57(2): 391-410.<br>2) Kalaritis P, Regenye R.W, Partridge J.J, <i>et al.</i> J. Org. Chem. <b>1990</b> , 55(3): 812-815. |
| 19 |    | +8.6 (1.24, CH <sub>3</sub> OH), 20°C, ee = 95%                                          | Not found                             | Marco I, Valhondo M, Martín-Fontecha M, <i>et al.</i> J. Med. Chem. <b>2011</b> , 54(23): 7986-7999.                                                                                                               |
| 20 |    | 1) -8.7 (1.24, CH <sub>3</sub> OH), 20°C, ee = 97%<br>2) -9.3 (1.24, CH <sub>3</sub> OH) | 1) Not found<br>2) 4.15 (m, 1H)       | 1) Marco I, Valhondo M, Martín-Fontecha M, <i>et al.</i> J. Med. Chem. <b>2011</b> , 54(23): 7986-7999.<br>2) Urban F.J, Moore B S. J. Heterocycl. Chem. <b>1992</b> , 29(2): 431-438.                             |
| 21 |    | -37.5 (1.2, CH <sub>3</sub> OH), 20°C                                                    | Not found                             | Marco I, Valhondo M, Martín-Fontecha M, <i>et al.</i> J. Med. Chem. <b>2011</b> , 54(23): 7986-7999.                                                                                                               |
| 22 |   | +35.1 (0.24, CH <sub>3</sub> OH)                                                         | Not found                             | Wipf, P.; Huryn, D. M.; Laporte, M. G.; <i>et al.</i> <b>2022</b> , WO2022/120048.                                                                                                                                 |
| 23 |  | +39 (0.042, CHCl <sub>3</sub> )                                                          | Not found                             | Wipf, P.; Huryn, D. M.; Laporte, M. G.; <i>et al.</i> <b>2022</b> , WO2022/120048.                                                                                                                                 |
| 24 |  | -18.1 (0.3, CHCl <sub>3</sub> )                                                          | Not found                             | Wipf, P.; Huryn, D. M.; Laporte, M. G.; <i>et al.</i> <b>2022</b> , WO2022/120048.                                                                                                                                 |

**Table S4.** Conformational analysis of compound **35** at different levels in DMF.

| Carboxyl<br>arrangement             |   | Boltzmann distribution (%) |                  |       |                  |        |                  |        |                  |        |                  |        |                  |        |                  |       |
|-------------------------------------|---|----------------------------|------------------|-------|------------------|--------|------------------|--------|------------------|--------|------------------|--------|------------------|--------|------------------|-------|
|                                     |   | B3LYP                      |                  |       | M062X            |        | ωB97XD           |        | APFD             |        | BH&HLYP          |        | O3LYP            |        | Cam-B3LYP        |       |
|                                     |   | 6-311<br>G(d,p)            | 6-311+<br>G(d,p) | TZVP  | 6-311+<br>G(d,p) | TVZP   | 6-311+<br>G(d,p) | TZVP   | 6-311+<br>G(d,p) | TZVP   | 6-311+<br>G(d,p) | TZVP   | 6-311+<br>G(d,p) | TZVP   | 6-311+<br>G(d,p) | TZVP  |
| 29C1                                | e | 40.56                      | 57.00            | 59.47 | 32.17            | 37.75  | 49.77            | 53.44  | 41.06            | 45.79  | 61.56            | 56.43  | 49.17            | 50.44  | 61.78            | 63.49 |
| 29C2                                | e | 17.15                      | 16.84            | 16.33 | 9.75             | 9.01   | 9.35             | 8.42   | 4.48             | 4.34   | 13.06            | 19.3   | 22.93            | 22.7   | 14.01            | 13.49 |
| 29C3                                | e | 8.15                       | 9.93             | 8.46  | 3.83             | 3.65   | 6.01             | 5.20   | 5.02             | 4.79   | 10.80            | 7.48   | 13.92            | 12.85  | 6.17             | 5.58  |
| 29C4                                | a | 17.47                      | 7.56             | 7.53  | 33.06            | 28.47  | 15.51            | 14.19  | 16.29            | 14.64  | 7.35             | 9.84   | 7.31             | 7.25   | 8.48             | 8.29  |
| 29C5                                | a | 7.26                       | 5.87             | 5.69  | 9.31             | 10.54  | 12.23            | 12.59  | 16.2             | 15.85  | 3.86             | 3.63   | 3.68             | 3.8    | 5.78             | 5.78  |
| 29C6                                | a | 9.34                       | 2.70             | 2.42  | 11.76            | 10.47  | 7.02             | 6.03   | 16.82            | 14.44  | 3.18             | 3.26   | 2.83             | 2.81   | 3.73             | 3.32  |
| 29C7                                | e | 0.02                       | 0.06             | 0.06  | 0.02             | 0.02   | 0.03             | 0.03   | 0.01             | 0.02   | 0.11             | 0.03   | 0.13             | 0.12   | 0.02             | 0.02  |
| 29C8                                | a | 0.05                       | 0.04             | 0.04  | 0.10             | 0.09   | 0.08             | 0.1    | 0.12             | 0.13   | 0.08             | 0.03   | 0.03             | 0.03   | 0.03             | 0.03  |
|                                     | e | 65.88                      | 83.83            | 84.32 | 45.77            | 50.43  | 65.16            | 67.09  | 50.57            | 54.94  | 85.53            | 83.24  | 86.15            | 86.11  | 81.98            | 82.58 |
|                                     | a | 34.12                      | 16.17            | 15.68 | 54.23            | 49.57  | 34.84            | 32.91  | 49.43            | 45.06  | 14.47            | 16.76  | 13.85            | 13.89  | 18.02            | 17.42 |
| Calc. [α] <sub>D</sub> <sup>a</sup> |   | -8.51                      | -1.13            | -2.09 | -31.86           | -34.33 | -26.09           | -26.69 | -44.89           | -42.15 | +3.08            | +3.40  | +4.83            | +3.23  | -4.03            | -4.48 |
| Calc. [α] <sub>D</sub> <sup>b</sup> |   | -6.08                      | +5.39            | +4.76 | -31.55           | -33.30 | -22.36           | -22.31 | -43.46           | -39.36 | +10.76           | +10.97 | +12.23           | +10.99 | +3.59            | +3.58 |

[a] OR step at the B3LYP/Aug-cc-pVDZ level using PCM; [b] OR step at the M06-2X/Aug-cc-pVDZ level using PCM.

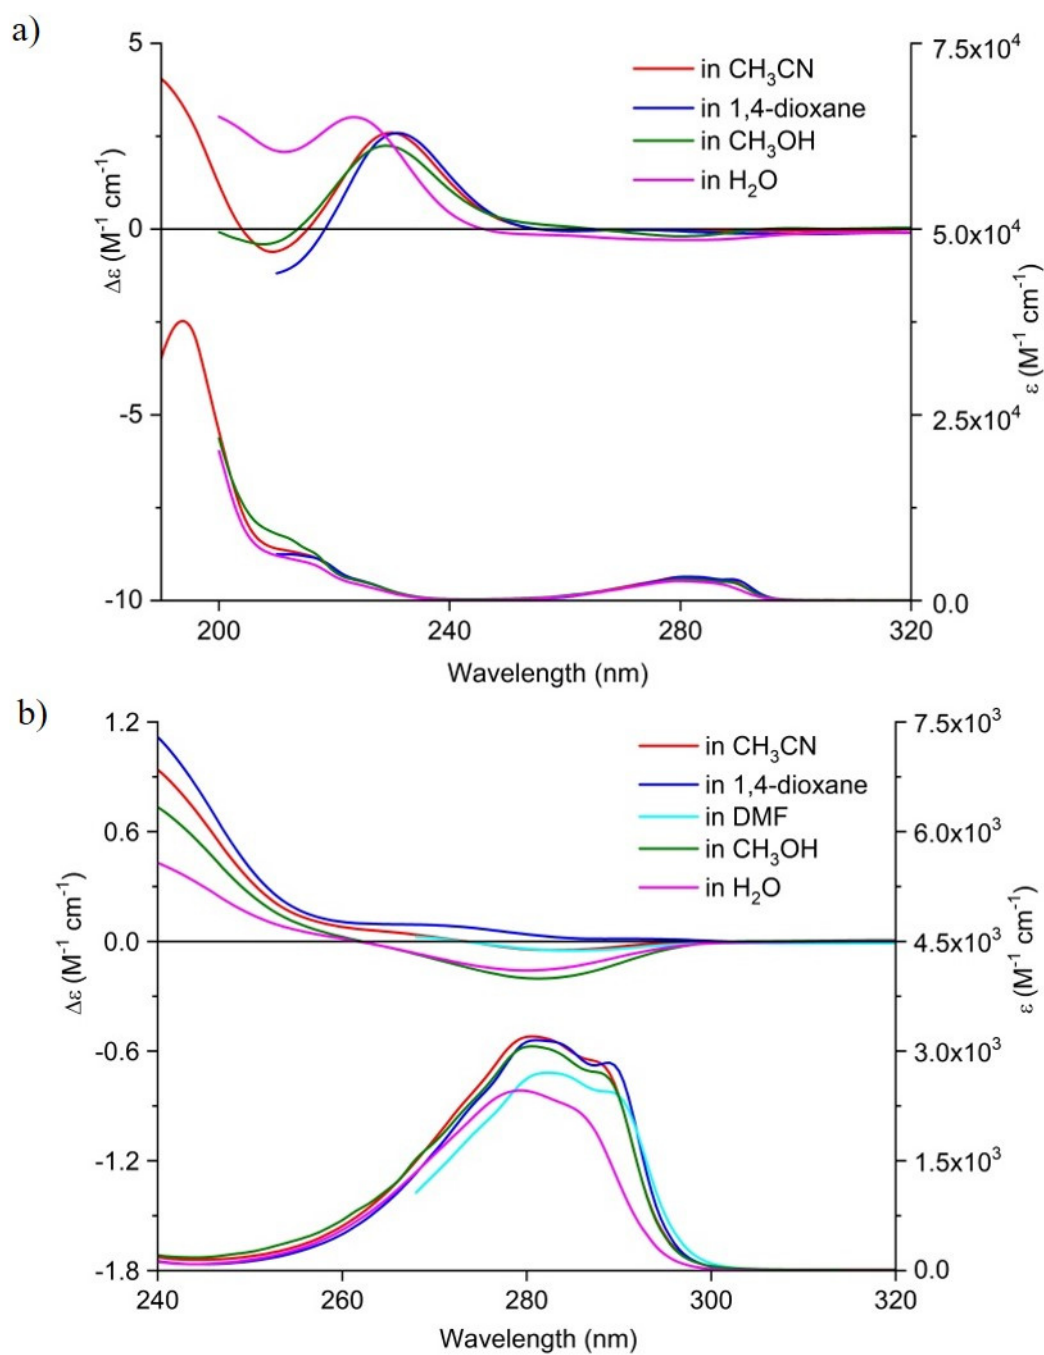

**Figure S1.** Experimental UV and ECD spectra of **35** in various solvents. a) full spectra from 320 nm to 190 nm, b) partially enlarged curves at 240-320 nm.
